# Supplementary material for: Nonlinear Optical Materials: Predicting the First-Order Molecular Hyperpolarizability of Organic Molecular Structures
Source: MDPI journal article supplement (doi:10.3390/photonics10050545), 2023-05-08

# *Supplementary Materials*

## **Nonlinear Optical Materials: Predicting the First-Order Molecular Hyperpolarizability of Organic Molecular Structures**

**Francisco A. Santos <sup>1,\*</sup>, Carlos E. R. Cardoso <sup>2</sup>, José J. Rodrigues, Jr. <sup>1</sup>, Leonardo De Boni <sup>3</sup> and Luis M. G. Abegão <sup>2,\*</sup>**

<sup>1</sup> Department of Physics, Federal University of Sergipe, São Cristovão 49100-000, Brazil; joatan@ufs.br

<sup>2</sup> Photonics Group, Institute of Physics, Federal University of Goiás (UFG), Goiânia 74690-900, Brazil; carlos.ribeiro@discente.ufg.br

<sup>3</sup> Photonics Group, Institute of Physics of São Carlos, University of São Paulo, São Carlos 13560-970, Brazil; deboni@ifsc.usp.br

\* Correspondence: fdessian@gmail.com (F.A.S.); luis.abegao@ufg.br (L.M.G.A.)

## 1 – Optimized Geometries

**Table S1.** Optimized geometry in solvent for compounds used to perform the calculation of the static ( $\beta_0$ ) and dynamic ( $\beta_{\text{HRS}}$ ) first hyperpolarizability  $\beta$  (in  $10^{-30} \text{ cm}^4 \text{ statvolt}^{-1}$ ). The values below correspond to the functional CAM-B3LYP with the basis set 6-311++G(2d,2p).

| Compound: A1          |          |          |          | Compound: A2          |          |          |          |
|-----------------------|----------|----------|----------|-----------------------|----------|----------|----------|
| Cartesian coordinates |          |          |          | Cartesian coordinates |          |          |          |
| O                     | -1.95773 | -0.95865 | 0.74943  | O                     | 5.86887  | -1.21291 | -1.31155 |
| C                     | -0.75457 | -1.03800 | 0.85124  | N                     | 5.51530  | -0.34114 | -0.54046 |
| C                     | 0.00000  | -2.14640 | 0.20276  | O                     | 6.27400  | 0.33348  | 0.12953  |
| C                     | -0.72826 | -3.12640 | -0.46970 | C                     | 4.07785  | -0.08786 | -0.41132 |
| C                     | -0.07937 | -4.17720 | -1.08579 | C                     | 3.18585  | -0.84212 | -1.14316 |
| C                     | 1.30619  | -4.25681 | -1.04209 | C                     | 1.83492  | -0.58705 | -1.01039 |
| C                     | 2.03712  | -3.28370 | -0.38220 | C                     | 3.65402  | 0.90617  | 0.43983  |
| C                     | 1.38865  | -2.23099 | 0.24272  | C                     | 2.29818  | 1.12157  | 0.56478  |
| C                     | 0.00000  | 0.00000  | 1.67783  | N                     | 1.91399  | 2.18083  | 1.50705  |
| C                     | 0.75457  | 1.03800  | 0.85124  | O                     | 0.82836  | 2.09818  | 2.05039  |
| C                     | 0.00000  | 2.14640  | 0.20276  | O                     | 2.71180  | 3.07687  | 1.70384  |
| C                     | -1.38865 | 2.23099  | 0.24272  | C                     | 1.34367  | 0.39036  | -0.15144 |
| C                     | -2.03712 | 3.28370  | -0.38220 | C                     | -0.14378 | 0.64444  | -0.02952 |
| C                     | -1.30619 | 4.25681  | -1.04209 | C                     | -0.98093 | 0.00975  | -1.10056 |
| C                     | 0.07937  | 4.17720  | -1.08579 | C                     | -1.07294 | 0.57009  | -2.35928 |
| C                     | 0.72826  | 3.12640  | -0.46970 | C                     | -1.86648 | -0.00456 | -3.33004 |
| O                     | 1.95773  | 0.95865  | 0.74943  | C                     | -2.58449 | -1.15108 | -3.03073 |
| H                     | -1.80439 | -3.04262 | -0.49416 | C                     | -2.47531 | -1.68393 | -1.77605 |
| H                     | -0.64948 | -4.93605 | -1.60218 | N                     | -1.68233 | -1.11787 | -0.84254 |
| H                     | 1.81502  | -5.07887 | -1.52560 | C                     | -1.63396 | -1.76951 | 0.46147  |
| H                     | 3.11558  | -3.34099 | -0.35368 | C                     | -0.72960 | -2.79423 | 0.66419  |
| H                     | 1.97140  | -1.46928 | 0.73811  | C                     | -0.70980 | -3.42647 | 1.89723  |
| H                     | 0.73905  | -0.48744 | 2.30690  | C                     | -1.58662 | -3.03163 | 2.89527  |
| H                     | -0.73905 | 0.48744  | 2.30690  | C                     | -2.49006 | -2.00466 | 2.66669  |
| H                     | -1.97140 | 1.46928  | 0.73811  | C                     | -2.52192 | -1.36300 | 1.43942  |
| H                     | -3.11558 | 3.34099  | -0.35368 | Br                    | -4.08075 | 1.88105  | 0.04504  |
| H                     | -1.81502 | 5.07887  | -1.52560 | H                     | 3.54151  | -1.61224 | -1.80770 |
| H                     | 0.64948  | 4.93605  | -1.60218 | H                     | 1.15013  | -1.16858 | -1.60626 |
| H                     | 1.80439  | 3.04262  | -0.49416 | H                     | 4.35771  | 1.49785  | 0.99937  |
|                       |          |          |          | H                     | -0.33692 | 1.71409  | -0.07239 |
|                       |          |          |          | H                     | -0.47720 | 0.32861  | 0.95276  |
|                       |          |          |          | H                     | -0.51618 | 1.47116  | -2.56372 |
|                       |          |          |          | H                     | -1.93271 | 0.44232  | -4.31043 |
|                       |          |          |          | H                     | -3.22516 | -1.62748 | -3.75447 |
|                       |          |          |          | H                     | -3.00317 | -2.57010 | -1.46546 |
|                       |          |          |          | H                     | -0.05791 | -3.10071 | -0.12398 |
|                       |          |          |          | H                     | -0.00967 | -4.22947 | 2.07301  |
|                       |          |          |          | H                     | -1.56722 | -3.52781 | 3.85454  |
|                       |          |          |          | H                     | -3.17387 | -1.69930 | 3.44475  |
|                       |          |          |          | H                     | -3.20767 | -0.55036 | 1.23924  |

| Compound: A3 |                       |          |          |
|--------------|-----------------------|----------|----------|
|              | Cartesian coordinates |          |          |
| N            | 6.91562               | 0.43690  | -0.19718 |
| C            | 5.53097               | 0.34077  | -0.15352 |
| C            | 4.84040               | -0.44390 | -1.07715 |
| C            | 3.46010               | -0.49736 | -1.06219 |
| C            | 2.71959               | 0.22162  | -0.12765 |
| C            | 1.24863               | 0.21551  | -0.11599 |
| N            | 0.50938               | 1.29839  | -0.10664 |
| C            | -0.79910              | 0.88079  | -0.09706 |
| C            | -1.89620              | 1.86013  | -0.11723 |
| C            | -1.69885              | 3.12116  | 0.44466  |
| C            | -2.70870              | 4.06771  | 0.43778  |
| C            | -3.93806              | 3.77514  | -0.13369 |
| C            | -4.14259              | 2.52856  | -0.70426 |
| C            | -3.13167              | 1.58153  | -0.69965 |
| C            | -0.84402              | -0.49090 | -0.09221 |
| C            | -1.97754              | -1.43212 | -0.05248 |
| C            | -2.84740              | -1.44001 | 1.03479  |
| C            | -3.92601              | -2.30812 | 1.07020  |
| C            | -4.14698              | -3.18786 | 0.02187  |
| C            | -3.28569              | -3.19129 | -1.06445 |
| C            | -2.21142              | -2.31767 | -1.10254 |
| N            | 0.47483               | -0.90955 | -0.11586 |
| C            | 0.92666               | -2.26952 | 0.16906  |
| C            | 0.95826               | -2.56823 | 1.65920  |
| C            | 3.41335               | 1.01437  | 0.78255  |
| C            | 4.79254               | 1.07498  | 0.77493  |
| H            | 7.39240               | -0.33963 | -0.62462 |
| H            | 7.35792               | 0.73037  | 0.65802  |
| H            | 5.39267               | -1.00244 | -1.82080 |
| H            | 2.95284               | -1.09196 | -1.80922 |
| H            | -0.74011              | 3.35171  | 0.88476  |
| H            | -2.53518              | 5.03840  | 0.88112  |
| H            | -4.72691              | 4.51391  | -0.13988 |
| H            | -5.09201              | 2.29293  | -1.16455 |
| H            | -3.30229              | 0.62207  | -1.16402 |
| H            | -2.67550              | -0.75651 | 1.85402  |
| H            | -4.59331              | -2.29936 | 1.92031  |
| H            | -4.98754              | -3.86646 | 0.05021  |
| H            | -3.45510              | -3.86939 | -1.88882 |
| H            | -1.55550              | -2.30984 | -1.96212 |
| H            | 0.26385               | -2.95857 | -0.34546 |
| H            | 1.91413               | -2.39090 | -0.26089 |
| H            | 1.30405               | -3.58746 | 1.82479  |
| H            | -0.03202              | -2.46880 | 2.09936  |
| H            | 1.63533               | -1.88948 | 2.17509  |
| H            | 2.85779               | 1.59195  | 1.50712  |
| H            | 5.30816               | 1.69771  | 1.49355  |

| Compound: A4 |                       |          |          |
|--------------|-----------------------|----------|----------|
|              | Cartesian coordinates |          |          |
| N            | 6.96073               | 0.21714  | -0.06334 |
| C            | 5.57510               | 0.14278  | -0.02168 |
| C            | 4.83008               | 1.08419  | 0.69066  |
| C            | 3.45156               | 1.03764  | 0.68841  |
| C            | 2.76124               | 0.05441  | -0.01807 |
| C            | 1.29382               | 0.07109  | -0.02430 |
| N            | 0.57144               | 1.16569  | -0.08961 |
| C            | -0.74202              | 0.77208  | -0.07048 |
| C            | -1.82355              | 1.76475  | -0.16045 |
| C            | -1.62812              | 3.04282  | 0.36133  |
| C            | -2.62374              | 4.00140  | 0.28286  |
| C            | -3.83583              | 3.70312  | -0.32147 |
| C            | -4.03794              | 2.43860  | -0.85238 |
| C            | -3.04122              | 1.47985  | -0.77604 |
| C            | -0.81241              | -0.59684 | 0.01745  |
| C            | -1.95581              | -1.51832 | 0.11758  |
| C            | -2.87703              | -1.38546 | 1.15387  |
| C            | -3.96163              | -2.24120 | 1.24862  |
| C            | -4.13800              | -3.24936 | 0.31339  |
| C            | -3.22485              | -3.39425 | -0.71959 |
| C            | -2.14389              | -2.53394 | -0.81783 |
| N            | 0.49861               | -1.03542 | 0.04353  |
| C            | 0.92039               | -2.40125 | 0.30413  |
| C            | 3.50865               | -0.87564 | -0.73610 |
| C            | 4.88982               | -0.83679 | -0.73923 |
| H            | 7.39344               | 0.70589  | 0.70275  |
| H            | 7.43723               | -0.64122 | -0.28506 |
| H            | 5.34194               | 1.85678  | 1.24860  |
| H            | 2.88975               | 1.77556  | 1.24194  |
| H            | -0.68270              | 3.27757  | 0.82737  |
| H            | -2.45267              | 4.98579  | 0.69589  |
| H            | -4.61336              | 4.45125  | -0.38366 |
| H            | -4.97362              | 2.19824  | -1.33766 |
| H            | -3.20749              | 0.50523  | -1.20988 |
| H            | -2.73880              | -0.60377 | 1.88690  |
| H            | -4.66801              | -2.12309 | 2.05803  |
| H            | -4.98325              | -3.91847 | 0.38870  |
| H            | -3.35805              | -4.17434 | -1.45567 |
| H            | -1.44629              | -2.64126 | -1.63679 |
| H            | 0.19105               | -2.88357 | 0.94676  |
| H            | 1.88013               | -2.38815 | 0.80850  |
| H            | 1.01021               | -2.97545 | -0.61552 |
| H            | 3.01105               | -1.63255 | -1.32498 |
| H            | 5.44633               | -1.56440 | -1.31433 |

**Compound: A5**

Cartesian coordinates

|   |          |          |          |
|---|----------|----------|----------|
| O | 4.05822  | -0.59970 | 0.01745  |
| C | 3.28455  | 0.32861  | 0.01279  |
| H | 3.66570  | 1.36833  | 0.01923  |
| C | 1.82676  | 0.21186  | -0.00116 |
| C | 1.03136  | 1.35166  | -0.00328 |
| C | -0.34376 | 1.26949  | -0.01511 |
| C | -0.98342 | 0.01654  | -0.03031 |
| N | -2.34770 | -0.08263 | -0.05629 |
| C | -3.16178 | 1.10991  | 0.03042  |
| C | -2.98445 | -1.37932 | 0.02991  |
| C | -0.16986 | -1.13675 | -0.02010 |
| C | 1.19913  | -1.03280 | -0.00817 |
| H | 1.50233  | 2.32663  | 0.00671  |
| H | -0.92300 | 2.17767  | -0.01207 |
| H | -2.95755 | 1.79225  | -0.79592 |
| H | -3.00158 | 1.65173  | 0.96663  |
| H | -4.20856 | 0.83045  | -0.02305 |
| H | -2.68777 | -2.02497 | -0.79763 |
| H | -4.06026 | -1.25008 | -0.02157 |
| H | -2.74826 | -1.89393 | 0.96515  |
| H | -0.61886 | -2.11614 | -0.02122 |
| H | 1.81478  | -1.92111 | -0.00187 |

**Compound: A6**

Cartesian coordinates

|   |          |          |          |
|---|----------|----------|----------|
| C | -6.22151 | -0.22002 | -0.39255 |
| N | -5.04136 | -0.97410 | -0.02873 |
| C | -5.22551 | -2.19638 | 0.72212  |
| C | -3.81721 | -0.34412 | -0.00390 |
| C | -2.68790 | -0.96218 | 0.55563  |
| C | -1.45524 | -0.34095 | 0.53461  |
| C | -1.28835 | 0.92552  | -0.01503 |
| C | -0.00322 | 1.67314  | 0.00859  |
| C | 1.29240  | 0.94450  | -0.01004 |
| C | 1.47371  | -0.29483 | -0.61467 |
| C | 2.71436  | -0.89762 | -0.66784 |
| C | 3.84170  | -0.28000 | -0.10344 |
| N | 5.08474  | -0.86658 | -0.16404 |
| C | 5.20509  | -2.23364 | -0.61997 |
| C | 6.17942  | -0.29911 | 0.59237  |
| C | 3.65257  | 0.96921  | 0.51522  |
| C | 2.41223  | 1.56411  | 0.53961  |
| O | -0.01233 | 2.89120  | 0.04260  |
| C | -2.41619 | 1.55723  | -0.53338 |
| C | -3.64820 | 0.94477  | -0.54130 |
| H | -7.08212 | -0.88120 | -0.37690 |
| H | -6.13514 | 0.18068  | -1.40178 |
| H | -6.41598 | 0.61388  | 0.28996  |
| H | -6.23402 | -2.56323 | 0.55967  |
| H | -5.07978 | -2.05662 | 1.79865  |
| H | -4.53716 | -2.97035 | 0.38448  |
| H | -2.76902 | -1.93218 | 1.01746  |
| H | -0.61476 | -0.84545 | 0.98795  |
| H | 0.63642  | -0.79447 | -1.07900 |
| H | 2.80411  | -1.85202 | -1.15973 |
| H | 4.84608  | -2.34045 | -1.64341 |
| H | 4.65054  | -2.93688 | 0.01015  |
| H | 6.25183  | -2.52002 | -0.60974 |
| H | 6.37913  | 0.72694  | 0.28511  |
| H | 7.07803  | -0.87735 | 0.40262  |
| H | 5.99121  | -0.30108 | 1.67104  |
| H | 4.48247  | 1.48130  | 0.97352  |
| H | 2.28841  | 2.53594  | 0.99492  |
| H | -2.30704 | 2.55591  | -0.93066 |
| H | -4.48721 | 1.47405  | -0.96181 |

| Compound: A7          |          |          |          | Compound: A8          |          |          |          |
|-----------------------|----------|----------|----------|-----------------------|----------|----------|----------|
| Cartesian coordinates |          |          |          | Cartesian coordinates |          |          |          |
| C                     | 2.20930  | -2.35352 | 0.15997  | C                     | -3.14718 | 0.67736  | 0.00860  |
| C                     | 0.84339  | -2.03974 | 0.78929  | C                     | -1.86617 | 1.28782  | 0.56500  |
| C                     | 0.95413  | -2.11492 | 2.30917  | C                     | -1.78180 | 1.02573  | 2.07560  |
| C                     | 0.29017  | -0.68241 | 0.24715  | C                     | -0.53693 | 0.83647  | -0.14353 |
| C                     | 1.29423  | 0.44570  | 0.01586  | C                     | -0.66548 | 0.48914  | -1.63293 |
| C                     | 1.97044  | 0.93707  | 1.25764  | C                     | -1.30974 | -0.71628 | -2.27992 |
| C                     | 3.21065  | 1.40703  | 1.38563  | C                     | -1.86598 | -1.90125 | -2.00965 |
| C                     | 4.27566  | 1.58030  | 0.41017  | C                     | -2.21445 | -2.71898 | -0.84053 |
| C                     | 5.56291  | 1.91609  | 0.72762  | C                     | -3.02643 | -3.80577 | -1.02901 |
| C                     | 6.41580  | 2.04807  | -0.39570 | S                     | -3.33665 | -4.66559 | 0.41576  |
| C                     | 5.77013  | 1.82248  | -1.56764 | C                     | -2.35959 | -3.57779 | 1.31779  |
| S                     | 4.11484  | 1.44325  | -1.31480 | C                     | -1.83353 | -2.60630 | 0.53415  |
| N                     | -0.38373 | -1.05198 | -0.97825 | N                     | 0.30327  | 2.01880  | 0.00059  |
| C                     | -1.21025 | -0.02518 | -1.58177 | C                     | 1.65998  | 1.97862  | -0.46896 |
| C                     | -2.05382 | 0.66710  | -0.54432 | C                     | 2.24758  | 0.64244  | -0.10301 |
| C                     | -3.14633 | 1.44043  | -0.88407 | C                     | 3.60291  | 0.40327  | -0.22846 |
| C                     | -3.89552 | 2.05020  | 0.10428  | C                     | 4.12848  | -0.81552 | 0.15202  |
| N                     | -5.04234 | 2.85841  | -0.27493 | N                     | 5.55907  | -1.04217 | 0.01450  |
| O                     | -5.69756 | 3.38187  | 0.61210  | O                     | 6.00858  | -2.11636 | 0.37882  |
| O                     | -5.29839 | 2.97818  | -1.46288 | O                     | 6.24289  | -0.14861 | -0.45871 |
| C                     | -3.58401 | 1.90176  | 1.44814  | C                     | 3.32845  | -1.82369 | 0.66866  |
| C                     | -2.49767 | 1.13573  | 1.79476  | C                     | 1.97859  | -1.59846 | 0.78832  |
| C                     | -1.72592 | 0.52389  | 0.80622  | C                     | 1.43367  | -0.37577 | 0.39783  |
| O                     | -0.68446 | -0.21744 | 1.23058  | O                     | 0.09548  | -0.23858 | 0.55202  |
| C                     | -0.86578 | -2.36308 | -0.81994 | C                     | -0.48891 | 3.15139  | 0.02482  |
| C                     | -1.82900 | -3.02933 | -1.55462 | C                     | -0.13185 | 4.47064  | -0.18746 |
| C                     | -2.10099 | -4.35505 | -1.22794 | C                     | -1.12813 | 5.43859  | -0.07447 |
| C                     | -1.42921 | -4.99188 | -0.19836 | C                     | -2.43259 | 5.09325  | 0.23191  |
| C                     | -0.45924 | -4.30512 | 0.52997  | C                     | -2.77215 | 3.75414  | 0.43829  |
| C                     | -0.18596 | -2.99358 | 0.21642  | C                     | -1.79968 | 2.78973  | 0.33037  |
| H                     | 2.97807  | -1.67283 | 0.52193  | H                     | -3.18672 | -0.39529 | 0.17324  |
| H                     | 2.17336  | -2.29679 | -0.92639 | H                     | -3.26810 | 0.87073  | -1.05394 |
| H                     | 2.50164  | -3.36573 | 0.43243  | H                     | -4.00039 | 1.11642  | 0.52370  |
| H                     | 1.68132  | -1.39963 | 2.68710  | H                     | -1.81194 | -0.03906 | 2.29463  |
| H                     | 1.29742  | -3.10903 | 2.59220  | H                     | -2.63162 | 1.49839  | 2.56463  |
| H                     | -0.00010 | -1.93265 | 2.79324  | H                     | -0.86960 | 1.43891  | 2.50038  |
| H                     | 0.75598  | 1.28191  | -0.43741 | H                     | 0.34769  | 0.49896  | -2.04115 |
| H                     | 2.00654  | 0.10476  | -0.72924 | H                     | -1.14129 | 1.36031  | -2.09042 |
| H                     | 1.35864  | 0.93463  | 2.14900  | H                     | -1.27740 | -0.53496 | -3.34994 |
| H                     | 3.50880  | 1.72012  | 2.37911  | H                     | -2.17953 | -2.41070 | -2.91418 |
| H                     | 5.88376  | 2.06428  | 1.74757  | H                     | -3.45683 | -4.13731 | -1.95833 |
| H                     | 7.46204  | 2.30255  | -0.33263 | H                     | -2.22478 | -3.71794 | 2.37601  |
| H                     | 6.16788  | 1.85543  | -2.56679 | H                     | -1.18335 | -1.84059 | 0.91043  |
| H                     | -1.83901 | -0.47765 | -2.34250 | H                     | 2.22386  | 2.76600  | 0.03018  |
| H                     | -0.57673 | 0.69414  | -2.10124 | H                     | 1.74890  | 2.15925  | -1.54795 |
| H                     | -3.42695 | 1.56778  | -1.91841 | H                     | 4.25932  | 1.16898  | -0.61226 |
| H                     | -4.18888 | 2.38415  | 2.19806  | H                     | 3.76568  | -2.76381 | 0.96154  |
| H                     | -2.22147 | 0.99744  | 2.82901  | H                     | 1.32211  | -2.36248 | 1.17516  |
| H                     | -2.36505 | -2.55110 | -2.36073 | H                     | 0.88148  | 4.75024  | -0.43590 |
| H                     | -2.85443 | -4.89033 | -1.78832 | H                     | -0.87381 | 6.47642  | -0.23791 |
| H                     | -1.65893 | -6.01946 | 0.04284  | H                     | -3.19106 | 5.85869  | 0.30638  |
| H                     | 0.06581  | -4.80191 | 1.33444  | H                     | -3.79242 | 3.48754  | 0.67829  |

| Compound: A9          |          |          |          | Compound: B1          |          |          |          |
|-----------------------|----------|----------|----------|-----------------------|----------|----------|----------|
| Cartesian coordinates |          |          |          | Cartesian coordinates |          |          |          |
| C                     | -0.06822 | 3.06445  | -1.31231 | C                     | -0.20619 | -3.26698 | -0.91160 |
| C                     | -1.47259 | 2.49180  | -1.16126 | C                     | -0.24138 | -2.36414 | 0.31079  |
| C                     | -2.05028 | 2.20938  | -2.55667 | N                     | 0.11643  | -0.97266 | 0.03533  |
| C                     | -1.57632 | 1.19970  | -0.26945 | C                     | 1.40567  | -0.48257 | 0.00401  |
| C                     | -0.48651 | 1.16142  | 0.81823  | C                     | 2.58788  | -1.35109 | 0.18817  |
| C                     | -0.57667 | 0.02576  | 1.78922  | C                     | 3.16256  | -1.48124 | 1.44896  |
| C                     | 0.33154  | -0.92131 | 2.01154  | C                     | 4.28195  | -2.27660 | 1.63471  |
| C                     | 1.66173  | -1.08712 | 1.39324  | C                     | 4.84082  | -2.95096 | 0.56083  |
| C                     | 2.56025  | -0.03740 | 1.25746  | C                     | 4.27767  | -2.82558 | -0.69982 |
| C                     | 3.80422  | -0.26054 | 0.68129  | C                     | 3.15861  | -2.03046 | -0.88453 |
| C                     | 4.93753  | 0.58939  | 0.39665  | C                     | 1.28947  | 0.88204  | -0.12881 |
| C                     | 5.20081  | 1.94102  | 0.58718  | C                     | 2.32982  | 1.92068  | -0.20125 |
| C                     | 6.41877  | 2.45221  | 0.17981  | C                     | 3.64301  | 1.64282  | -0.57803 |
| C                     | 7.37277  | 1.62445  | -0.41839 | C                     | 4.59268  | 2.65003  | -0.63198 |
| C                     | 7.13582  | 0.27710  | -0.61882 | C                     | 4.25082  | 3.95505  | -0.31552 |
| C                     | 5.91202  | -0.23401 | -0.20041 | C                     | 2.94580  | 4.24443  | 0.05376  |
| N                     | 5.43522  | -1.52804 | -0.27032 | C                     | 1.99667  | 3.23908  | 0.10999  |
| C                     | 6.12574  | -2.64537 | -0.86691 | N                     | -0.03451 | 1.22184  | -0.16244 |
| C                     | 4.15596  | -1.55154 | 0.24600  | C                     | -0.71648 | 0.10535  | -0.06566 |
| C                     | 3.27518  | -2.61857 | 0.38654  | C                     | -2.18498 | 0.08418  | -0.03369 |
| C                     | 2.04841  | -2.36953 | 0.96680  | C                     | -2.95242 | -0.92643 | -0.61066 |
| N                     | -2.93075 | 1.29039  | 0.23910  | C                     | -4.33237 | -0.87763 | -0.57049 |
| C                     | -3.64741 | 0.17524  | 0.78643  | C                     | -2.83614 | 1.16046  | 0.57358  |
| C                     | -3.20392 | -1.08549 | 0.09724  | C                     | -4.21207 | 1.22289  | 0.61830  |
| C                     | -3.86027 | -2.27954 | 0.32207  | C                     | -4.94302 | 0.19556  | 0.04786  |
| C                     | -3.46284 | -3.42599 | -0.33883 | N                     | -6.40349 | 0.25001  | 0.09487  |
| N                     | -4.17013 | -4.66888 | -0.08629 | O                     | -7.02813 | -0.66909 | -0.40605 |
| O                     | -3.80830 | -5.67006 | -0.68446 | O                     | -6.92384 | 1.21135  | 0.63341  |
| O                     | -5.09381 | -4.65827 | 0.71284  | H                     | -0.55845 | -4.26009 | -0.63756 |
| C                     | -2.40934 | -3.41425 | -1.24218 | H                     | 0.80394  | -3.36299 | -1.29971 |
| C                     | -1.74686 | -2.23324 | -1.46682 | H                     | -0.83859 | -2.89067 | -1.71311 |
| C                     | -2.13070 | -1.07127 | -0.79563 | H                     | 0.45015  | -2.73234 | 1.06456  |
| O                     | -1.41981 | 0.03674  | -1.08377 | H                     | -1.22839 | -2.36149 | 0.76262  |
| C                     | -3.30584 | 2.61410  | 0.33588  | H                     | 2.73238  | -0.94882 | 2.28550  |
| C                     | -4.35764 | 3.17207  | 1.04048  | H                     | 4.71907  | -2.36637 | 2.61888  |
| C                     | -4.52302 | 4.55491  | 0.97381  | H                     | 5.71532  | -3.56931 | 0.70454  |
| C                     | -3.66232 | 5.34756  | 0.23560  | H                     | 4.71316  | -3.34339 | -1.54245 |
| C                     | -2.61002 | 4.76365  | -0.47529 | H                     | 2.73213  | -1.92106 | -1.87174 |
| C                     | -2.43726 | 3.40263  | -0.42242 | H                     | 3.92862  | 0.63663  | -0.84140 |
| H                     | 0.60421  | 2.33697  | -1.76548 | H                     | 5.60434  | 2.41224  | -0.92962 |
| H                     | 0.35649  | 3.39042  | -0.36654 | H                     | 4.99275  | 4.73961  | -0.35961 |
| H                     | -0.10247 | 3.92961  | -1.97272 | H                     | 2.66521  | 5.25882  | 0.30077  |
| H                     | -1.40253 | 1.54095  | -3.11943 | H                     | 0.98074  | 3.46626  | 0.39506  |
| H                     | -2.13787 | 3.14753  | -3.10157 | H                     | -2.48114 | -1.74750 | -1.12416 |
| H                     | -3.03849 | 1.75838  | -2.49448 | H                     | -4.93053 | -1.65231 | -1.02113 |
| H                     | -0.54881 | 2.10804  | 1.35981  | H                     | -2.24486 | 1.94879  | 1.01147  |
| H                     | 0.47106  | 1.14313  | 0.30946  | H                     | -4.71925 | 2.04813  | 1.09044  |
| H                     | -1.48204 | -0.02670 | 2.37888  |                       |          |          |          |
| H                     | 0.06393  | -1.69513 | 2.72287  |                       |          |          |          |
| H                     | 2.30228  | 0.94654  | 1.62211  |                       |          |          |          |
| H                     | 4.46373  | 2.58490  | 1.04686  |                       |          |          |          |
| H                     | 6.63717  | 3.50077  | 0.32090  |                       |          |          |          |
| H                     | 8.31659  | 2.04602  | -0.73409 |                       |          |          |          |
| H                     | 7.87978  | -0.34922 | -1.08840 |                       |          |          |          |
| H                     | 7.19376  | -2.55547 | -0.68732 |                       |          |          |          |
| H                     | 5.95245  | -2.70177 | -1.94235 |                       |          |          |          |
| H                     | 5.78824  | -3.57028 | -0.40814 |                       |          |          |          |
| H                     | 3.53318  | -3.61471 | 0.05911  |                       |          |          |          |

|   |          |          |          |
|---|----------|----------|----------|
| H | 1.35321  | -3.18866 | 1.09155  |
| H | -4.71130 | 0.32721  | 0.59737  |
| H | -3.53342 | 0.07785  | 1.87209  |
| H | -4.69126 | -2.32437 | 1.00922  |
| H | -2.12239 | -4.32092 | -1.74862 |
| H | -0.91607 | -2.18189 | -2.15379 |
| H | -5.02645 | 2.56512  | 1.63318  |
| H | -5.33540 | 5.01329  | 1.52025  |
| H | -3.80304 | 6.41814  | 0.20782  |
| H | -1.94585 | 5.38259  | -1.06355 |

**Compound: B2**  
Cartesian coordinates

|   |          |          |          |
|---|----------|----------|----------|
| C | 0.29546  | -2.45127 | 0.33586  |
| N | -0.08855 | -1.07440 | 0.06267  |
| C | -1.38556 | -0.60779 | 0.02532  |
| C | -2.55116 | -1.50073 | 0.13009  |
| C | -2.76706 | -2.51036 | -0.80521 |
| C | -3.86985 | -3.34186 | -0.70288 |
| C | -4.77420 | -3.17313 | 0.33411  |
| C | -4.56893 | -2.17028 | 1.26909  |
| C | -3.46390 | -1.34186 | 1.16972  |
| C | -1.28773 | 0.76209  | -0.07239 |
| C | -2.35004 | 1.77428  | -0.17700 |
| C | -3.56393 | 1.50805  | -0.80721 |
| C | -4.54228 | 2.48426  | -0.89796 |
| C | -4.32405 | 3.74566  | -0.36637 |
| C | -3.11513 | 4.02438  | 0.25333  |
| C | -2.13759 | 3.04880  | 0.34587  |
| N | 0.02945  | 1.12668  | -0.07748 |
| C | 0.72694  | 0.01682  | -0.00360 |
| C | 2.19313  | -0.00805 | -0.00641 |
| C | 2.87484  | 1.04212  | 0.61074  |
| C | 4.25244  | 1.08685  | 0.60988  |
| C | 2.92592  | -1.00957 | -0.64244 |
| C | 4.30656  | -0.97750 | -0.64821 |
| C | 4.95022  | 0.06919  | -0.01679 |
| N | 6.41212  | 0.10548  | -0.01710 |
| O | 6.96187  | 1.04669  | 0.52770  |
| O | 7.00836  | -0.80785 | -0.56134 |
| H | -0.46917 | -2.91564 | 0.94909  |
| H | 1.23349  | -2.46444 | 0.87934  |
| H | 0.40341  | -3.02417 | -0.58219 |
| H | -2.07514 | -2.63582 | -1.62643 |
| H | -4.02642 | -4.11809 | -1.43827 |
| H | -5.63610 | -3.82016 | 0.41268  |
| H | -5.26913 | -2.03433 | 2.08090  |
| H | -3.30377 | -0.56283 | 1.90112  |
| H | -3.74220 | 0.53540  | -1.24071 |
| H | -5.47596 | 2.25978  | -1.39429 |
| H | -5.08752 | 4.50708  | -0.43932 |
| H | -2.93263 | 5.00612  | 0.66742  |
| H | -1.19484 | 3.26797  | 0.82481  |
| H | 2.30840  | 1.82383  | 1.09169  |
| H | 4.78647  | 1.89083  | 1.08901  |
| H | 2.42292  | -1.80810 | -1.16421 |
| H | 4.88059  | -1.74325 | -1.14329 |

**Compound: B3**  
Cartesian coordinates

|    |          |          |          |
|----|----------|----------|----------|
| Cl | 6.18555  | 2.69340  | 1.43880  |
| C  | 6.20987  | 1.14933  | 0.65342  |
| N  | 7.40148  | 0.64174  | 0.41208  |
| C  | 7.33703  | -0.53824 | -0.19050 |
| Cl | 8.85753  | -1.28594 | -0.54964 |
| N  | 6.26618  | -1.18975 | -0.53830 |
| C  | 5.10756  | -0.56597 | -0.23610 |
| N  | 3.99729  | -1.22952 | -0.59086 |
| C  | 2.62986  | -0.91912 | -0.45503 |
| C  | 1.73660  | -1.83904 | -1.00276 |
| C  | 0.37797  | -1.63160 | -0.92276 |
| C  | -0.13588 | -0.49756 | -0.29596 |
| C  | -1.59375 | -0.34098 | -0.19818 |
| N  | -2.41309 | -1.33787 | 0.03878  |
| C  | -3.67903 | -0.81288 | 0.05033  |
| C  | -4.84523 | -1.67134 | 0.30915  |
| C  | -4.67927 | -2.84870 | 1.03804  |
| C  | -5.75385 | -3.68221 | 1.29526  |
| C  | -7.01885 | -3.35731 | 0.82883  |
| C  | -7.19484 | -2.19292 | 0.09794  |
| C  | -6.11957 | -1.35919 | -0.16224 |
| C  | -3.61723 | 0.53848  | -0.18861 |
| C  | -4.66588 | 1.57647  | -0.23976 |
| C  | -5.28146 | 2.00524  | 0.93238  |
| C  | -6.27736 | 2.96772  | 0.89426  |
| C  | -6.66684 | 3.51819  | -0.31661 |
| C  | -6.05854 | 3.09978  | -1.49004 |
| C  | -5.06663 | 2.13360  | -1.45163 |
| N  | -2.27730 | 0.82811  | -0.35439 |
| C  | -1.73179 | 2.14058  | -0.65615 |
| C  | 0.76301  | 0.40514  | 0.25850  |
| C  | 2.13270  | 0.20920  | 0.18429  |
| N  | 5.04413  | 0.62482  | 0.36994  |
| H  | 4.19822  | -2.10778 | -1.04359 |
| H  | 2.11413  | -2.72331 | -1.49836 |
| H  | -0.30290 | -2.35369 | -1.34686 |
| H  | -3.69445 | -3.10268 | 1.40014  |
| H  | -5.60315 | -4.58891 | 1.86447  |
| H  | -7.85845 | -4.00756 | 1.02950  |
| H  | -8.17394 | -1.93366 | -0.28001 |
| H  | -6.27337 | -0.46506 | -0.74674 |
| H  | -4.97977 | 1.57499  | 1.87675  |
| H  | -6.74910 | 3.28808  | 1.81227  |
| H  | -7.44355 | 4.26896  | -0.34640 |
| H  | -6.36142 | 3.52092  | -2.43812 |

|   |          |         |          |
|---|----------|---------|----------|
| H | -4.60733 | 1.79671 | -2.37081 |
| H | -2.44095 | 2.69512 | -1.25994 |
| H | -0.80981 | 2.02848 | -1.21555 |
| H | -1.53411 | 2.70312 | 0.25415  |
| H | 0.40281  | 1.27404 | 0.78822  |
| H | 2.80247  | 0.92256 | 0.62804  |

#### Compound: B4

Cartesian coordinates

|    |          |          |          |
|----|----------|----------|----------|
| O  | -0.00002 | 2.71399  | 0.00074  |
| C  | -0.00000 | 1.48245  | 0.00072  |
| C  | -1.25986 | 0.69765  | 0.00075  |
| H  | -1.17583 | -0.38677 | 0.00093  |
| C  | -2.45630 | 1.31879  | 0.00041  |
| H  | -2.42442 | 2.40786  | 0.00006  |
| C  | -3.78649 | 0.71533  | 0.00034  |
| C  | -4.00763 | -0.67615 | 0.00209  |
| H  | -3.16439 | -1.36005 | 0.00374  |
| C  | -5.29393 | -1.20153 | 0.00188  |
| C  | -6.38775 | -0.33268 | -0.00010 |
| Br | -8.15530 | -1.05198 | -0.00045 |
| C  | -6.20722 | 1.04870  | -0.00180 |
| H  | -7.06505 | 1.71213  | -0.00329 |
| H  | -5.45246 | -2.27441 | 0.00327  |
| C  | -4.91204 | 1.55988  | -0.00153 |
| H  | -4.76626 | 2.63700  | -0.00283 |
| C  | 1.25987  | 0.69768  | 0.00061  |
| H  | 1.17590  | -0.38675 | 0.00069  |
| C  | 2.45630  | 1.31882  | 0.00039  |
| C  | 3.78650  | 0.71534  | 0.00020  |
| C  | 4.91204  | 1.55989  | 0.00013  |
| H  | 4.76628  | 2.63701  | 0.00022  |
| C  | 6.20723  | 1.04870  | -0.00005 |
| H  | 7.06506  | 1.71214  | -0.00010 |
| C  | 6.38776  | -0.33267 | -0.00018 |
| Br | 8.15530  | -1.05199 | -0.00045 |
| C  | 5.29393  | -1.20152 | -0.00012 |
| H  | 5.45245  | -2.27441 | -0.00022 |
| C  | 4.00763  | -0.67614 | 0.00006  |
| H  | 3.16439  | -1.36005 | 0.00009  |
| H  | 2.42447  | 2.40789  | 0.00034  |

#### Compound: B5

Cartesian coordinates

|    |          |          |          |
|----|----------|----------|----------|
| O  | -0.00002 | 2.47123  | 0.00064  |
| C  | -0.00000 | 1.23969  | 0.00061  |
| C  | -1.25986 | 0.45489  | 0.00064  |
| H  | -1.17583 | -0.62953 | 0.00082  |
| C  | -2.45630 | 1.07603  | 0.00030  |
| H  | -2.42442 | 2.16510  | -0.00005 |
| C  | -3.78649 | 0.47257  | 0.00023  |
| C  | -4.00763 | -0.91891 | 0.00198  |
| H  | -3.16439 | -1.60281 | 0.00364  |
| C  | -5.29393 | -1.44429 | 0.00178  |
| C  | -6.38775 | -0.57544 | -0.00020 |
| Cl | -8.15530 | -1.29474 | -0.00056 |
| C  | -6.20722 | 0.80594  | -0.00191 |
| H  | -7.06505 | 1.46937  | -0.00340 |
| H  | -5.45246 | -2.51717 | 0.00316  |
| C  | -4.91204 | 1.31712  | -0.00163 |
| H  | -4.76626 | 2.39424  | -0.00294 |
| C  | 1.25987  | 0.45492  | 0.00051  |
| H  | 1.17590  | -0.62952 | 0.00059  |
| C  | 2.45630  | 1.07605  | 0.00028  |
| C  | 3.78650  | 0.47258  | 0.00010  |
| C  | 4.91204  | 1.31713  | 0.00003  |
| H  | 4.76628  | 2.39425  | 0.00012  |
| C  | 6.20723  | 0.80593  | -0.00015 |
| H  | 7.06506  | 1.46937  | -0.00020 |
| C  | 6.38776  | -0.57544 | -0.00028 |
| Cl | 8.15530  | -1.29476 | -0.00056 |
| C  | 5.29393  | -1.44429 | -0.00022 |
| H  | 5.45245  | -2.51717 | -0.00032 |
| C  | 4.00763  | -0.91890 | -0.00005 |
| H  | 3.16439  | -1.60282 | -0.00002 |
| H  | 2.42447  | 2.16513  | 0.00023  |

#### Compound: B6

Cartesian coordinates

|   |         |          |          |
|---|---------|----------|----------|
| O | 0.00000 | 2.39749  | -0.00002 |
| C | 0.00000 | 1.17118  | -0.00006 |
| C | 1.24850 | 0.38736  | -0.00010 |
| H | 1.15252 | -0.69129 | -0.00020 |
| C | 2.44222 | 0.98808  | -0.00000 |
| H | 2.43533 | 2.07428  | 0.00011  |
| C | 3.75746 | 0.36512  | -0.00001 |
| C | 3.95320 | -1.02291 | -0.00015 |
| H | 3.10223 | -1.69153 | -0.00027 |
| C | 5.21624 | -1.56100 | -0.00015 |
| C | 6.33802 | -0.72769 | -0.00001 |
| O | 7.53661 | -1.35223 | -0.00002 |
| C | 6.16990 | 0.65043  | 0.00014  |
| H | 7.01856 | 1.31791  | 0.00025  |
| H | 5.36671 | -2.63277 | -0.00026 |

#### Compound: B7

Cartesian coordinates

|   |          |          |          |
|---|----------|----------|----------|
| O | 0.00000  | 2.34044  | 0.00033  |
| C | 0.00000  | 1.11684  | 0.00015  |
| C | -1.25072 | 0.33187  | 0.00011  |
| H | -1.15460 | -0.74660 | -0.00001 |
| C | -2.44116 | 0.93411  | 0.00017  |
| H | -2.43577 | 2.01995  | 0.00019  |
| C | -3.75926 | 0.30622  | 0.00014  |
| C | -3.94343 | -1.07916 | 0.00101  |
| H | -3.08926 | -1.74270 | 0.00185  |
| C | -5.20947 | -1.62832 | 0.00088  |
| C | -6.29615 | -0.77678 | -0.00013 |
| F | -7.53439 | -1.31189 | -0.00025 |
| C | -6.16562 | 0.59303  | -0.00096 |
| H | -7.04509 | 1.22234  | -0.00170 |
| H | -5.36381 | -2.69880 | 0.00156  |



|   |          |          |          |
|---|----------|----------|----------|
| C | 4.88767  | 1.17669  | 0.00013  |
| H | 4.76385  | 2.25314  | 0.00024  |
| C | -1.24850 | 0.38736  | -0.00005 |
| H | -1.15252 | -0.69129 | -0.00005 |
| C | -2.44222 | 0.98808  | -0.00003 |
| C | -3.75746 | 0.36512  | -0.00002 |
| C | -4.88767 | 1.17669  | 0.00004  |
| H | -4.76385 | 2.25314  | 0.00007  |
| C | -6.16990 | 0.65043  | 0.00006  |
| H | -7.01856 | 1.31791  | 0.00010  |
| C | -6.33802 | -0.72769 | 0.00001  |
| O | -7.53661 | -1.35223 | 0.00002  |
| C | -5.21624 | -1.56100 | -0.00006 |
| H | -5.36671 | -2.63277 | -0.00010 |
| C | -3.95320 | -1.02291 | -0.00007 |
| H | -3.10223 | -1.69153 | -0.00013 |
| H | -2.43533 | 2.07428  | -0.00002 |
| C | 8.71307  | -0.55635 | 0.00015  |
| H | 9.54563  | -1.25378 | 0.00012  |
| H | 8.76285  | 0.06985  | 0.89290  |
| H | 8.76296  | 0.07006  | -0.89246 |
| C | -8.71307 | -0.55635 | 0.00011  |
| H | -9.54563 | -1.25379 | 0.00012  |
| H | -8.76295 | 0.06999  | -0.89254 |
| H | -8.76286 | 0.06992  | 0.89282  |

#### Compound: B8

Cartesian coordinates

|   |          |          |          |
|---|----------|----------|----------|
| C | -6.60377 | 0.26615  | 0.0087   |
| C | -6.49331 | 1.65182  | 0.00104  |
| C | -5.23637 | 2.24087  | -0.00695 |
| H | -7.38387 | 2.26832  | 0.0014   |
| C | -4.09423 | 1.45428  | -0.00745 |
| H | -5.14242 | 3.32001  | -0.01289 |
| C | -4.19941 | 0.06276  | 0.00012  |
| H | -3.11603 | 1.917    | -0.01386 |
| C | -5.46709 | -0.52435 | 0.0084   |
| H | -5.56588 | -1.60292 | 0.01499  |
| H | -7.58104 | -0.20092 | 0.0152   |
| C | -3.00772 | -0.77431 | -0.00075 |
| C | -2.77634 | -2.11379 | -0.0024  |
| N | -1.42115 | -2.34778 | -0.00286 |
| H | -3.48822 | -2.92225 | -0.00363 |
| C | -0.88137 | -1.17057 | -0.00168 |
| O | -1.78886 | -0.16346 | -0.00042 |
| C | 0.48715  | -0.83018 | -0.00133 |
| C | 1.65405  | -0.54474 | -0.0009  |
| C | 3.03823  | -0.21047 | -0.00028 |
| C | 4.00603  | -1.2207  | -0.00249 |
| C | 5.34911  | -0.89767 | -0.00185 |
| H | 3.69597  | -2.25725 | -0.0047  |
| C | 5.74078  | 0.44168  | 0.00102  |
| H | 6.09819  | -1.67856 | -0.00356 |
| C | 4.7814   | 1.4551   | 0.00323  |
| C | 3.43898  | 1.12984  | 0.00258  |
| H | 5.09202  | 2.49163  | 0.00547  |
| H | 2.69077  | 1.91141  | 0.0043   |
| C | 7.13267  | 0.77769  | 0.00173  |
| N | 8.24953  | 1.0479   | 0.00232  |

|   |          |          |          |
|---|----------|----------|----------|
| C | -4.88833 | 1.12559  | -0.00079 |
| H | -4.76293 | 2.20119  | -0.00142 |
| C | 1.25072  | 0.33187  | -0.00000 |
| H | 1.15460  | -0.74660 | -0.00019 |
| C | 2.44116  | 0.93412  | 0.00011  |
| C | 3.75926  | 0.30622  | 0.00000  |
| C | 4.88833  | 1.12559  | 0.00029  |
| H | 4.76293  | 2.20119  | 0.00057  |
| C | 6.16562  | 0.59303  | 0.00022  |
| H | 7.04509  | 1.22234  | 0.00044  |
| C | 6.29615  | -0.77678 | -0.00015 |
| F | 7.53439  | -1.31189 | -0.00022 |
| C | 5.20946  | -1.62832 | -0.00045 |
| H | 5.36381  | -2.69880 | -0.00074 |
| C | 3.94344  | -1.07916 | -0.00037 |
| H | 2.43577  | 2.01995  | 0.00032  |
| H | 3.08926  | -1.74270 | -0.00061 |

#### Compound: B9

Cartesian coordinates

|   |          |          |          |
|---|----------|----------|----------|
| O | -1.23279 | 2.53578  | 0.02798  |
| C | -1.19906 | 1.31083  | 0.02589  |
| C | -2.46976 | 0.53313  | 0.03290  |
| C | -2.53727 | -0.83917 | 0.30263  |
| C | -3.74776 | -1.50064 | 0.31611  |
| C | -4.92974 | -0.80743 | 0.04754  |
| O | -6.06509 | -1.53888 | 0.07535  |
| C | -7.30466 | -0.88990 | -0.18053 |
| C | -4.88271 | 0.55962  | -0.22591 |
| C | -3.66045 | 1.21057  | -0.22357 |
| C | 0.08351  | 0.57992  | -0.00238 |
| C | 1.24456  | 1.24458  | 0.06533  |
| C | 2.59479  | 0.69458  | 0.03374  |
| C | 3.68449  | 1.57081  | 0.13394  |
| C | 4.98423  | 1.11013  | 0.11124  |
| C | 5.23655  | -0.25644 | -0.01397 |
| O | 6.53841  | -0.62335 | -0.02696 |
| C | 6.85930  | -2.00276 | -0.15052 |
| C | 4.16856  | -1.14870 | -0.11687 |
| C | 2.86930  | -0.66886 | -0.09238 |
| H | -1.64285 | -1.40498 | 0.52547  |
| H | -3.80350 | -2.55953 | 0.53453  |
| H | -8.06594 | -1.66173 | -0.10317 |
| H | -7.32296 | -0.45977 | -1.18458 |
| H | -7.49984 | -0.11023 | 0.55943  |
| H | -5.78317 | 1.11787  | -0.43837 |
| H | -3.61665 | 2.27237  | -0.42856 |
| H | 0.06218  | -0.49658 | -0.09510 |
| H | 1.18005  | 2.32574  | 0.15413  |
| H | 3.50068  | 2.63481  | 0.23145  |
| H | 5.82232  | 1.79114  | 0.18920  |
| H | 7.94468  | -2.05854 | -0.13688 |

|   |         |          |          |
|---|---------|----------|----------|
| H | 6.48597 | -2.41065 | -1.09293 |
| H | 6.45492 | -2.57716 | 0.68637  |
| H | 4.33869 | -2.21118 | -0.21607 |
| H | 2.05797 | -1.38152 | -0.17497 |

| Compound: C1          |          |          |          | Compound: C2          |          |          |          |
|-----------------------|----------|----------|----------|-----------------------|----------|----------|----------|
| Cartesian coordinates |          |          |          | Cartesian coordinates |          |          |          |
| C                     | 5.35687  | 3.29410  | -0.10442 | C                     | -0.41366 | -1.42348 | -1.93783 |
| N                     | 5.89885  | 1.96820  | 0.09910  | C                     | -1.44255 | -0.97435 | -0.93778 |
| C                     | 5.06010  | 0.87944  | 0.06042  | C                     | -2.63774 | -1.67633 | -0.82727 |
| C                     | 3.66314  | 1.02923  | 0.03159  | Br                    | -2.93352 | -3.24768 | -1.88152 |
| C                     | 2.81899  | -0.05841 | 0.02120  | C                     | -3.67167 | -1.30440 | 0.02363  |
| C                     | 3.31363  | -1.36789 | 0.03036  | O                     | -4.82848 | -1.99700 | 0.11337  |
| C                     | 2.53608  | -2.59572 | 0.01959  | C                     | -3.53054 | -0.16772 | 0.81629  |
| C                     | 1.23095  | -2.93567 | 0.00767  | C                     | -4.68218 | 0.27423  | 1.69558  |
| C                     | 0.00001  | -2.12529 | 0.00059  | C                     | -5.74790 | 0.99171  | 0.85975  |
| C                     | -1.23092 | -2.93567 | -0.00710 | C                     | -4.25341 | 1.13890  | 2.87663  |
| C                     | -2.53605 | -2.59571 | -0.01950 | C                     | -2.33532 | 0.51919  | 0.72858  |
| C                     | -3.31360 | -1.36788 | -0.03032 | C                     | -1.28725 | 0.13758  | -0.10144 |
| C                     | -2.81898 | -0.05840 | -0.01991 | C                     | -0.00719 | 0.97320  | -0.13402 |
| C                     | -3.66312 | 1.02923  | -0.03043 | C                     | 1.32625  | 0.21712  | 0.03347  |
| C                     | -5.06006 | 0.87945  | -0.06069 | C                     | 1.52026  | -0.84029 | 0.92674  |
| N                     | -5.89877 | 1.96824  | -0.09952 | C                     | 0.47419  | -1.39765 | 1.85592  |
| C                     | -5.35700 | 3.29400  | 0.10536  | C                     | 2.79792  | -1.40328 | 0.95901  |
| C                     | -7.32149 | 1.77859  | 0.07786  | Br                    | 3.16621  | -2.89088 | 2.11144  |
| C                     | -5.56300 | -0.43223 | -0.05677 | C                     | 3.85884  | -0.95291 | 0.18909  |
| C                     | -4.70684 | -1.50883 | -0.04600 | O                     | 5.08751  | -1.51539 | 0.22964  |
| O                     | 0.00001  | -0.89992 | 0.00104  | C                     | 3.66866  | 0.13495  | -0.66328 |
| C                     | 4.70688  | -1.50884 | 0.04468  | C                     | 4.82286  | 0.63196  | -1.50920 |
| C                     | 5.56304  | -0.43224 | 0.05525  | C                     | 5.00401  | -0.25832 | -2.74343 |
| C                     | 7.32139  | 1.77866  | -0.07975 | C                     | 4.69431  | 2.09728  | -1.91317 |
| H                     | 4.60814  | 3.53178  | 0.65033  | C                     | 2.40687  | 0.68650  | -0.71282 |
| H                     | 4.89600  | 3.41291  | -1.09039 | O                     | 0.02436  | 1.58224  | -1.46994 |
| H                     | 6.15712  | 4.02148  | -0.01206 | S                     | -0.34910 | 3.14545  | -1.53862 |
| H                     | 3.22433  | 2.01344  | 0.01685  | C                     | -0.17325 | 3.37713  | 0.19259  |
| H                     | 1.75322  | 0.09171  | 0.00235  | C                     | -0.17621 | 4.58549  | 0.86317  |
| H                     | 3.18828  | -3.46359 | 0.02338  | C                     | -0.00499 | 4.55733  | 2.23346  |
| H                     | 1.04860  | -4.00145 | 0.00371  | C                     | 0.17269  | 3.34300  | 2.88966  |
| H                     | -1.04858 | -4.00145 | -0.00341 | C                     | 0.17697  | 2.14702  | 2.19389  |
| H                     | -3.18825 | -3.46358 | -0.02387 | C                     | -0.01058 | 2.16543  | 0.81975  |
| H                     | -1.75323 | 0.09172  | 0.00000  | O                     | 0.68800  | 3.79966  | -2.27922 |
| H                     | -3.22434 | 2.01344  | -0.01466 | O                     | -1.71232 | 3.30693  | -1.94370 |
| H                     | -4.60749 | 3.53214  | -0.64847 | H                     | 0.04659  | -2.36284 | -1.63038 |
| H                     | -4.89715 | 3.41222  | 1.09188  | H                     | 0.36842  | -0.69301 | -2.08238 |
| H                     | -6.15715 | 4.02145  | 0.01262  | H                     | -0.88658 | -1.59854 | -2.90182 |
| H                     | -7.72963 | 1.12583  | -0.69325 | H                     | -4.79727 | -2.75435 | -0.48459 |
| H                     | -7.82064 | 2.73839  | -0.00899 | H                     | -5.13651 | -0.63317 | 2.09471  |
| H                     | -7.57009 | 1.34929  | 1.05410  | H                     | -5.34420 | 1.90923  | 0.43100  |
| H                     | -6.62511 | -0.61337 | -0.06189 | H                     | -6.60486 | 1.25534  | 1.47952  |
| H                     | -5.13227 | -2.50397 | -0.04581 | H                     | -6.10007 | 0.36237  | 0.04569  |
| H                     | 5.13233  | -2.50397 | 0.04354  | H                     | -3.87817 | 2.11017  | 2.55371  |
| H                     | 6.62516  | -0.61337 | 0.05928  | H                     | -3.47971 | 0.65586  | 3.47267  |
| H                     | 7.82062  | 2.73841  | 0.00711  | H                     | -5.10831 | 1.32544  | 3.52495  |
| H                     | 7.56905  | 1.34987  | -1.05646 | H                     | -2.21544 | 1.39311  | 1.34607  |
| H                     | 7.73029  | 1.12550  | 0.69063  | H                     | -0.42503 | -0.80097 | 1.88679  |
|                       |          |          |          | H                     | 0.87251  | -1.47094 | 2.86624  |

|   |          |          |          |
|---|----------|----------|----------|
| H | 0.18599  | -2.40556 | 1.55713  |
| H | 5.08897  | -2.24194 | 0.86491  |
| H | 5.72141  | 0.53016  | -0.89996 |
| H | 4.13199  | -0.19023 | -3.39458 |
| H | 5.14191  | -1.30045 | -2.46316 |
| H | 5.87625  | 0.05699  | -3.31571 |
| H | 3.86606  | 2.26223  | -2.60166 |
| H | 5.60328  | 2.41881  | -2.41972 |
| H | 4.54498  | 2.74263  | -1.04859 |
| H | 2.24282  | 1.51823  | -1.37645 |
| H | -0.29822 | 5.51643  | 0.32984  |
| H | 0.00260  | 5.47983  | 2.79482  |
| H | 0.31920  | 3.33336  | 3.96009  |
| H | 0.33365  | 1.21724  | 2.71844  |

### Compound: C3

Cartesian coordinates

|   |          |          |          |
|---|----------|----------|----------|
| C | 6.81512  | -1.08605 | 0.04696  |
| N | 5.99362  | 0.09435  | -0.10791 |
| C | 4.62350  | -0.02752 | -0.06345 |
| C | 3.99646  | -1.28197 | -0.08182 |
| C | 2.62104  | -1.38428 | -0.06772 |
| C | 1.79041  | -0.26612 | -0.02686 |
| C | 0.34486  | -0.44910 | -0.01608 |
| C | -0.59291 | 0.50249  | -0.01183 |
| C | -2.03861 | 0.29254  | -0.00154 |
| C | -2.63538 | -0.97250 | 0.05626  |
| C | -4.00474 | -1.11640 | 0.06070  |
| C | -4.80120 | 0.01532  | 0.00861  |
| N | -6.25553 | -0.13422 | 0.01403  |
| O | -6.71054 | -1.26313 | 0.06394  |
| O | -6.93133 | 0.87817  | -0.03174 |
| C | -4.25247 | 1.28171  | -0.04641 |
| C | -2.87861 | 1.40900  | -0.05048 |
| C | 2.41914  | 0.98008  | 0.00867  |
| C | 3.78913  | 1.10409  | -0.00462 |
| C | 6.60259  | 1.38340  | 0.13814  |
| H | 6.60664  | -1.81392 | -0.73652 |
| H | 6.66965  | -1.57613 | 1.01548  |
| H | 7.85968  | -0.80459 | -0.03905 |
| H | 4.58209  | -2.18589 | -0.10745 |
| H | 2.17454  | -2.36998 | -0.08603 |
| H | 0.03116  | -1.48628 | -0.01666 |
| H | -0.28964 | 1.54170  | -0.02275 |
| H | -2.02274 | -1.85966 | 0.10165  |
| H | -4.46819 | -2.08863 | 0.10544  |
| H | -4.90037 | 2.14233  | -0.08502 |
| H | -2.43985 | 2.39589  | -0.09386 |
| H | 1.82714  | 1.88285  | 0.05488  |
| H | 4.21682  | 2.09239  | 0.03207  |
| H | 7.67943  | 1.28999  | 0.04113  |
| H | 6.38032  | 1.77054  | 1.13809  |
| H | 6.27155  | 2.12013  | -0.59302 |

### Compound: C4

Cartesian coordinates

|   |          |          |          |
|---|----------|----------|----------|
| O | -0.00817 | 1.85609  | 2.25320  |
| C | -0.94819 | 2.42816  | 1.74505  |
| O | -2.10369 | 2.56658  | 2.33931  |
| C | -0.78445 | 3.04440  | 0.38135  |
| C | -1.17646 | 4.35215  | 0.14610  |
| C | -0.91667 | 4.95448  | -1.07206 |
| C | -0.27996 | 4.24313  | -2.07378 |
| C | 0.09738  | 2.92887  | -1.85563 |
| C | -0.15063 | 2.32235  | -0.63019 |
| C | 0.18236  | 0.88995  | -0.45141 |
| C | 1.51937  | 0.44820  | -0.43706 |
| C | 2.64231  | 1.30218  | -0.48545 |
| C | 3.91262  | 0.82255  | -0.44239 |
| C | 4.17412  | -0.57651 | -0.34697 |
| N | 5.44695  | -1.05237 | -0.33624 |
| C | 5.71120  | -2.48066 | -0.20852 |
| C | 5.65388  | -3.01191 | 1.21920  |
| C | 6.59705  | -0.15489 | -0.38473 |
| C | 6.97867  | 0.46082  | 0.95600  |
| C | 3.06911  | -1.43408 | -0.26243 |
| C | 1.79094  | -0.92385 | -0.30383 |
| O | 0.78815  | -1.82153 | -0.18885 |
| C | -0.83498 | -0.05540 | -0.33442 |
| C | -0.50432 | -1.42104 | -0.17551 |
| C | -1.44673 | -2.40113 | -0.00513 |
| C | -2.81350 | -2.06112 | 0.04932  |
| C | -3.16382 | -0.69141 | -0.14962 |
| C | -2.21995 | 0.25810  | -0.33717 |
| N | -3.76377 | -2.98989 | 0.28958  |
| C | -5.17961 | -2.62565 | 0.38084  |
| C | -5.89268 | -2.54190 | -0.96168 |
| C | -3.41850 | -4.39732 | 0.45776  |
| C | -3.20072 | -5.15097 | -0.84892 |
| H | -2.87865 | 2.76267  | 1.69643  |
| H | -1.69848 | 4.89185  | 0.92125  |
| H | -1.22891 | 5.97412  | -1.24366 |
| H | -0.08987 | 4.70315  | -3.03283 |
| H | 0.56493  | 2.36160  | -2.64840 |
| H | 2.47610  | 2.36675  | -0.53832 |
| H | 4.72732  | 1.52496  | -0.46062 |
| H | 6.69909  | -2.66158 | -0.62636 |
| H | 5.01382  | -3.02556 | -0.84345 |
| H | 6.41902  | -2.55163 | 1.84073  |

|    |          |          |          |
|----|----------|----------|----------|
| H  | 5.82041  | -4.08858 | 1.22306  |
| H  | 4.68755  | -2.81653 | 1.67946  |
| H  | 6.40902  | 0.62528  | -1.12009 |
| H  | 7.43297  | -0.73282 | -0.77272 |
| H  | 7.82401  | 1.13623  | 0.82877  |
| H  | 7.26565  | -0.30513 | 1.67343  |
| H  | 6.15395  | 1.02716  | 1.38400  |
| H  | 3.17408  | -2.49766 | -0.14080 |
| H  | -1.10066 | -3.41382 | 0.10376  |
| H  | -4.18961 | -0.36551 | -0.13425 |
| H  | -2.56172 | 1.27823  | -0.45506 |
| H  | -5.26855 | -1.68445 | 0.91709  |
| H  | -5.65700 | -3.37599 | 1.00694  |
| H  | -5.42787 | -1.80295 | -1.61098 |
| H  | -6.93045 | -2.24857 | -0.81015 |
| H  | -5.88397 | -3.50119 | -1.47610 |
| H  | -4.22863 | -4.86011 | 1.01581  |
| H  | -2.53609 | -4.47226 | 1.09181  |
| H  | -4.10715 | -5.16207 | -1.45040 |
| H  | -2.92043 | -6.18308 | -0.64115 |
| H  | -2.41002 | -4.69771 | -1.44337 |
| Cl | -4.30174 | 2.83041  | 0.45595  |

#### Compound: C5

Cartesian coordinates

|   |         |          |          |
|---|---------|----------|----------|
| C | 2.68984 | 1.51849  | 3.70127  |
| C | 3.62895 | 1.39052  | 2.50875  |
| N | 4.87316 | 0.71143  | 2.89299  |
| C | 5.95031 | 1.36675  | 3.30499  |
| C | 6.11055 | 2.77561  | 3.34832  |
| C | 6.40928 | 3.42354  | 4.48538  |
| C | 6.56027 | 4.86189  | 4.53790  |
| C | 6.84555 | 5.52136  | 5.67174  |
| C | 6.99658 | 6.98065  | 5.75474  |
| C | 6.55681 | 7.64719  | 6.89731  |
| C | 6.70859 | 9.03782  | 7.02176  |
| C | 7.32258 | 9.82059  | 6.02902  |
| N | 7.45332 | 11.20852 | 6.15023  |
| C | 7.28787 | 11.82538 | 7.46482  |
| C | 8.32036 | 11.92697 | 5.21830  |
| C | 7.75884 | 9.12274  | 4.88974  |
| C | 7.61157 | 7.73242  | 4.75484  |
| S | 7.17523 | 0.27364  | 3.81370  |
| C | 6.23371 | -1.09500 | 3.36916  |
| C | 6.56599 | -2.45643 | 3.46625  |
| C | 5.62776 | -3.39772 | 3.03562  |
| C | 4.39910 | -2.99571 | 2.52300  |
| C | 4.07284 | -1.63679 | 2.43345  |
| C | 5.00694 | -0.67173 | 2.86421  |
| C | 6.88688 | 1.63262  | -6.24697 |
| C | 6.58765 | 1.46486  | -4.78654 |
| C | 6.98524 | 2.44607  | -3.86643 |
| C | 6.67955 | 2.30946  | -2.51126 |
| C | 5.97132 | 1.18749  | -2.07580 |
| S | 5.54705 | 1.03620  | -0.34175 |
| O | 6.72132 | 0.42216  | 0.26423  |

#### Compound: C6

Cartesian coordinates

|   |          |          |          |
|---|----------|----------|----------|
| C | -9.13652 | -1.24761 | -1.30958 |
| C | -8.37772 | -1.86053 | -0.13060 |
| C | -6.90643 | -1.47839 | -0.14303 |
| C | -6.57705 | -0.12775 | -0.01530 |
| C | -5.35793 | 0.50812  | 0.00324  |
| C | -5.26867 | 1.92888  | 0.14379  |
| C | -6.41800 | 2.87309  | 0.28759  |
| C | -3.94926 | 2.26058  | 0.12180  |
| C | -3.12203 | 1.10444  | -0.02950 |
| C | -1.70079 | 1.17696  | -0.08874 |
| C | -0.95477 | 2.31264  | -0.01534 |
| C | 0.47323  | 2.36623  | -0.07268 |
| C | 1.08283  | 3.73518  | -0.06678 |
| C | 2.53041  | 3.75085  | 0.41246  |
| C | 2.59984  | 3.50467  | 1.92310  |
| C | 3.15650  | 5.11058  | 0.10724  |
| C | 3.30625  | 2.66897  | -0.34641 |
| C | 1.27142  | 1.25034  | -0.15800 |
| C | 2.67252  | 1.30062  | -0.30794 |
| C | 3.46573  | 0.14036  | -0.40850 |
| C | 4.85465  | 0.23279  | -0.81644 |
| N | 5.67573  | -0.89602 | -0.61667 |
| C | 7.09578  | -0.71263 | -0.96458 |
| C | 7.89856  | -0.10798 | 0.17233  |
| C | 5.23246  | -2.09201 | -0.13283 |
| N | 3.88313  | -2.22953 | 0.02416  |
| C | 3.31422  | -3.53105 | 0.41810  |
| C | 3.13897  | -3.66010 | 1.92000  |
| C | 2.94484  | -1.18294 | -0.12125 |
| O | 1.76782  | -1.46739 | 0.04430  |
| S | 6.29468  | -3.34016 | 0.23307  |

|   |         |          |          |
|---|---------|----------|----------|
| O | 5.29577 | 2.40351  | 0.10939  |
| O | 4.34935 | 0.20019  | -0.30625 |
| C | 5.54627 | 0.21477  | -2.98251 |
| C | 5.85432 | 0.35687  | -4.33683 |
| H | 1.76631 | 2.02567  | 3.40622  |
| H | 3.15584 | 2.09410  | 4.50720  |
| H | 2.42823 | 0.53453  | 4.10277  |
| H | 3.83147 | 2.38990  | 2.11590  |
| H | 3.11813 | 0.84268  | 1.71468  |
| H | 5.96917 | 3.32010  | 2.41591  |
| H | 6.54794 | 2.88196  | 5.41963  |
| H | 6.42217 | 5.40971  | 3.60656  |
| H | 6.96253 | 4.98664  | 6.61143  |
| H | 6.07515 | 7.10132  | 7.70505  |
| H | 6.32155 | 9.49055  | 7.92930  |
| H | 6.27204 | 11.67798 | 7.84680  |
| H | 7.43565 | 12.91023 | 7.41760  |
| H | 8.01314 | 11.42502 | 8.18182  |
| H | 7.97021 | 11.81817 | 4.18619  |
| H | 9.35601 | 11.57796 | 5.29552  |
| H | 8.31828 | 13.00359 | 5.42289  |
| H | 8.23484 | 9.64230  | 4.06377  |
| H | 7.99485 | 7.25645  | 3.85557  |
| H | 7.53331 | -2.77147 | 3.84757  |
| H | 5.87165 | -4.45770 | 3.08304  |
| H | 3.69206 | -3.74232 | 2.16580  |
| H | 3.12132 | -1.35541 | 1.99276  |
| H | 7.83210 | 2.16607  | -6.39265 |
| H | 6.08347 | 2.19622  | -6.73112 |
| H | 6.98410 | 0.65994  | -6.74057 |
| H | 7.53449 | 3.32327  | -4.19970 |
| H | 6.98731 | 3.06871  | -1.79715 |
| H | 4.97908 | -0.64457 | -2.63469 |
| H | 5.51752 | -0.40225 | -5.03867 |

|   |           |          |          |
|---|-----------|----------|----------|
| O | 5.36100   | 1.21696  | -1.33102 |
| C | -3.98214  | -0.02417 | -0.10533 |
| C | -3.65986  | -1.38904 | -0.24692 |
| C | -2.22177  | -1.83448 | -0.33318 |
| C | -4.57840  | -2.42971 | -0.31872 |
| C | -5.96997  | -2.48078 | -0.27789 |
| C | -9.04760  | -1.50801 | 1.19919  |
| H | -8.68172  | -1.52377 | -2.25974 |
| H | -9.15584  | -0.15935 | -1.24968 |
| H | -10.16904 | -1.59506 | -1.31315 |
| H | -8.42142  | -2.94409 | -0.24150 |
| H | -7.42130  | 0.54243  | 0.08574  |
| H | -7.01538  | 2.65549  | 1.17376  |
| H | -7.08724  | 2.83462  | -0.57272 |
| H | -6.05622  | 3.89485  | 0.37739  |
| H | -3.57754  | 3.26939  | 0.20765  |
| H | -1.16044  | 0.25677  | -0.20428 |
| H | -1.45165  | 3.26730  | 0.08798  |
| H | 0.46961   | 4.40739  | 0.53538  |
| H | 1.03481   | 4.12033  | -1.09138 |
| H | 2.06887   | 4.28959  | 2.46217  |
| H | 3.63615   | 3.51017  | 2.26103  |
| H | 2.16071   | 2.54911  | 2.20415  |
| H | 2.62044   | 5.90742  | 0.62390  |
| H | 3.13320   | 5.32503  | -0.96135 |
| H | 4.19600   | 5.14101  | 0.43415  |
| H | 4.32253   | 2.62385  | 0.02900  |
| H | 3.40420   | 2.96270  | -1.39458 |
| H | 0.81817   | 0.27968  | -0.14737 |
| H | 7.11500   | -0.06251 | -1.83077 |
| H | 7.48512   | -1.68418 | -1.23821 |
| H | 7.50712   | 0.86938  | 0.44718  |
| H | 8.93483   | 0.01761  | -0.13882 |
| H | 7.88239   | -0.75603 | 1.04600  |
| H | 3.97963   | -4.29575 | 0.04035  |
| H | 2.35816   | -3.61051 | -0.08442 |
| H | 4.09657   | -3.58030 | 2.42994  |
| H | 2.70935   | -4.63314 | 2.15504  |
| H | 2.46860   | -2.89240 | 2.30043  |
| H | -1.72203  | -1.40326 | -1.19869 |
| H | -2.16303  | -2.91407 | -0.42492 |
| H | -1.66138  | -1.54845 | 0.55477  |
| H | -4.12583  | -3.40553 | -0.42952 |
| H | -6.37242  | -3.48276 | -0.36565 |
| H | -9.06277  | -0.43080 | 1.36534  |
| H | -8.52956  | -1.97014 | 2.03822  |
| H | -10.07994 | -1.85596 | 1.20363  |

| Compound: C7          |          |          |          |
|-----------------------|----------|----------|----------|
| Cartesian coordinates |          |          |          |
| O                     | 2.63516  | 3.20890  | -0.09342 |
| N                     | 3.40664  | 2.36786  | 0.34710  |
| O                     | 4.38000  | 2.66225  | 1.03301  |
| C                     | 3.17861  | 0.96924  | 0.04590  |
| C                     | 4.30809  | 0.17721  | 0.13521  |
| C                     | 4.22089  | -1.16828 | -0.12095 |
| N                     | 5.40479  | -1.98003 | -0.04831 |
| O                     | 5.29506  | -3.18147 | -0.26237 |
| O                     | 6.47187  | -1.44400 | 0.22532  |
| C                     | 2.99495  | -1.74245 | -0.47417 |
| C                     | 1.88378  | -0.95941 | -0.53690 |
| C                     | 1.88497  | 0.44238  | -0.26688 |
| C                     | 0.69721  | 1.20546  | -0.34707 |
| C                     | -0.62295 | 0.77216  | -0.22898 |
| C                     | -1.67363 | 1.69597  | -0.53404 |
| C                     | -2.97704 | 1.36038  | -0.43698 |
| C                     | -1.08809 | -0.49390 | 0.24702  |
| C                     | -2.40931 | -0.77349 | 0.33702  |
| N                     | -3.36890 | 0.12239  | -0.01666 |
| C                     | -4.75953 | -0.21812 | 0.06383  |
| C                     | -5.58640 | 0.02719  | -1.02091 |
| C                     | -6.93034 | -0.29645 | -0.93813 |
| C                     | -7.44080 | -0.87220 | 0.21482  |
| C                     | -6.60391 | -1.11908 | 1.29196  |
| C                     | -5.26123 | -0.78718 | 1.22365  |
| H                     | 5.25124  | 0.62163  | 0.40007  |
| H                     | 2.94422  | -2.79099 | -0.71854 |
| H                     | 0.96747  | -1.41186 | -0.87304 |
| H                     | 0.81208  | 2.26114  | -0.50366 |
| H                     | -1.42576 | 2.69450  | -0.85956 |
| H                     | -3.76975 | 2.05219  | -0.66969 |
| H                     | -0.40503 | -1.25270 | 0.58473  |
| H                     | -2.76462 | -1.72860 | 0.68781  |
| H                     | -5.18126 | 0.45237  | -1.92736 |
| H                     | -7.57575 | -0.10817 | -1.78350 |
| H                     | -8.48860 | -1.12773 | 0.27392  |
| H                     | -6.99718 | -1.56036 | 2.19599  |
| H                     | -4.61300 | -0.95503 | 2.07114  |

| Compound: C8          |          |          |          |
|-----------------------|----------|----------|----------|
| Cartesian coordinates |          |          |          |
| C                     | 7.51392  | 1.80789  | 2.23396  |
| C                     | 8.19179  | 1.39236  | 0.94144  |
| N                     | 7.30194  | 1.32190  | -0.22517 |
| C                     | 6.31860  | 0.29345  | -0.12663 |
| C                     | 6.53237  | -0.99569 | -0.61024 |
| C                     | 5.55362  | -1.96474 | -0.49538 |
| C                     | 4.32064  | -1.68504 | 0.09356  |
| C                     | 3.32083  | -2.75463 | 0.18790  |
| C                     | 1.98604  | -2.67197 | 0.09246  |
| C                     | 1.22302  | -1.49064 | -0.24538 |
| C                     | -0.11634 | -1.36060 | -0.20706 |
| C                     | -1.04650 | -2.39006 | 0.18662  |
| C                     | -2.37187 | -2.27102 | 0.38008  |
| C                     | -3.16751 | -1.06307 | 0.34998  |
| C                     | -2.82550 | 0.24956  | 0.59991  |
| C                     | -3.90485 | 1.12514  | 0.50148  |
| C                     | -5.09832 | 0.50466  | 0.18079  |
| C                     | -6.34372 | 1.18981  | 0.02525  |
| C                     | -6.27538 | 2.61604  | 0.21127  |
| N                     | -6.19969 | 3.74776  | 0.36342  |
| C                     | -7.57601 | 0.67800  | -0.27326 |
| C                     | -7.81320 | -0.70966 | -0.48507 |
| N                     | -8.02927 | -1.82219 | -0.65957 |
| C                     | -8.72035 | 1.52108  | -0.39214 |
| N                     | -9.65325 | 2.17959  | -0.49262 |
| S                     | -4.85096 | -1.20630 | 0.00337  |
| C                     | 4.12211  | -0.39996 | 0.59919  |
| C                     | 5.09966  | 0.57071  | 0.48294  |
| C                     | 8.05518  | 1.31757  | -1.48146 |
| C                     | 8.54219  | 2.70423  | -1.87082 |
| H                     | 8.26099  | 1.90148  | 3.02142  |
| H                     | 6.77766  | 1.07794  | 2.56239  |
| H                     | 7.01632  | 2.76974  | 2.11845  |
| H                     | 8.70197  | 0.42875  | 1.08491  |
| H                     | 8.96379  | 2.12140  | 0.70646  |
| H                     | 7.47372  | -1.24809 | -1.07619 |
| H                     | 5.74494  | -2.95989 | -0.87453 |
| H                     | 3.73511  | -3.74449 | 0.34001  |
| H                     | 1.43535  | -3.59161 | 0.23560  |
| H                     | 1.78833  | -0.63663 | -0.59171 |
| H                     | -0.53040 | -0.41682 | -0.53051 |
| H                     | -0.64693 | -3.38822 | 0.30236  |
| H                     | -2.92496 | -3.18050 | 0.57425  |
| H                     | -1.83590 | 0.55908  | 0.88807  |
| H                     | -3.82908 | 2.18773  | 0.67065  |
| H                     | 3.20053  | -0.15982 | 1.10793  |
| H                     | 4.92309  | 1.56654  | 0.86133  |
| H                     | 8.90821  | 0.62646  | -1.43720 |
| H                     | 7.39258  | 0.94961  | -2.26205 |
| H                     | 9.22951  | 3.12182  | -1.13736 |
| H                     | 7.70084  | 3.38722  | -1.97315 |
| H                     | 9.06894  | 2.65945  | -2.82372 |

**Compound: C9**

Cartesian coordinates

|   |          |          |          |
|---|----------|----------|----------|
| C | -7.89152 | -2.99469 | -1.89764 |
| C | -8.66390 | -1.87444 | -1.22589 |
| N | -8.14207 | -1.53374 | 0.09938  |
| C | -6.78482 | -1.06365 | 0.06646  |
| C | -6.42705 | 0.12555  | -0.56660 |
| C | -5.11471 | 0.55167  | -0.58620 |
| C | -4.10759 | -0.19442 | 0.03153  |
| C | -2.70101 | 0.21112  | 0.05126  |
| C | -2.19621 | 1.37819  | -0.35634 |
| C | -0.78456 | 1.75457  | -0.33080 |
| C | 0.21374  | 0.85907  | -0.39031 |
| C | 1.61726  | 1.21769  | -0.39402 |
| C | 1.94692  | 2.68427  | -0.39609 |
| C | 0.89444  | 3.55460  | 0.30730  |
| C | 0.91731  | 3.28717  | 1.81551  |
| C | 1.21645  | 5.02687  | 0.05890  |
| C | -0.48750 | 3.22969  | -0.26754 |
| C | 2.53286  | 0.22501  | -0.42070 |
| C | 3.97015  | 0.32316  | -0.48165 |
| C | 4.80745  | 1.33947  | -0.90119 |
| C | 6.15883  | 1.00178  | -0.82615 |
| C | 6.39521  | -0.27480 | -0.35561 |
| C | 7.69668  | -0.81493 | -0.20660 |
| C | 8.10366  | -2.03542 | 0.22884  |
| C | 7.21207  | -3.06663 | 0.64462  |
| N | 6.49562  | -3.89765 | 0.97951  |
| C | 9.49806  | -2.33575 | 0.28537  |
| N | 10.62031 | -2.56964 | 0.32807  |
| S | 4.88729  | -1.06273 | -0.00208 |
| C | -4.47385 | -1.38525 | 0.65539  |
| C | -5.79110 | -1.81210 | 0.67452  |
| C | -9.04594 | -0.63417 | 0.81876  |
| C | -8.66910 | -0.46027 | 2.27846  |
| H | -8.35548 | -3.24713 | -2.85026 |
| H | -7.88496 | -3.88536 | -1.27107 |
| H | -6.85930 | -2.71073 | -2.09428 |
| H | -9.69839 | -2.18650 | -1.08423 |
| H | -8.69046 | -0.99548 | -1.88659 |
| H | -7.18477 | 0.72254  | -1.05499 |
| H | -4.87107 | 1.47222  | -1.09678 |
| H | -2.02427 | -0.52439 | 0.47041  |
| H | -2.87017 | 2.15175  | -0.70638 |
| H | -0.01729 | -0.19463 | -0.47347 |
| H | 2.03774  | 3.01520  | -1.43569 |
| H | 2.91504  | 2.85465  | 0.07147  |
| H | 1.89991  | 3.51479  | 2.22913  |
| H | 0.68817  | 2.24903  | 2.04878  |
| H | 0.18694  | 3.91502  | 2.32579  |
| H | 2.19546  | 5.28518  | 0.46357  |
| H | 0.47885  | 5.67079  | 0.53851  |
| H | 1.22049  | 5.25641  | -1.00705 |
| H | -0.57222 | 3.64526  | -1.27717 |
| H | -1.25450 | 3.72957  | 0.32682  |
| H | 2.14999  | -0.78745 | -0.38138 |
| H | 4.45516  | 2.27925  | -1.28712 |
| H | 6.96146  | 1.66293  | -1.11668 |
| H | 8.48944  | -0.13403 | -0.48866 |
| H | -3.71273 | -1.98490 | 1.13652  |

|   |           |          |         |
|---|-----------|----------|---------|
| H | -6.06461  | -2.73572 | 1.16327 |
| H | -10.04110 | -1.07368 | 0.75485 |
| H | -9.10830  | 0.35036  | 0.33245 |
| H | -8.63883  | -1.42437 | 2.78396 |
| H | -9.40315  | 0.16896  | 2.78019 |
| H | -7.69423  | 0.01119  | 2.38910 |



## 2 – Hyper-QCC: Post-processing software

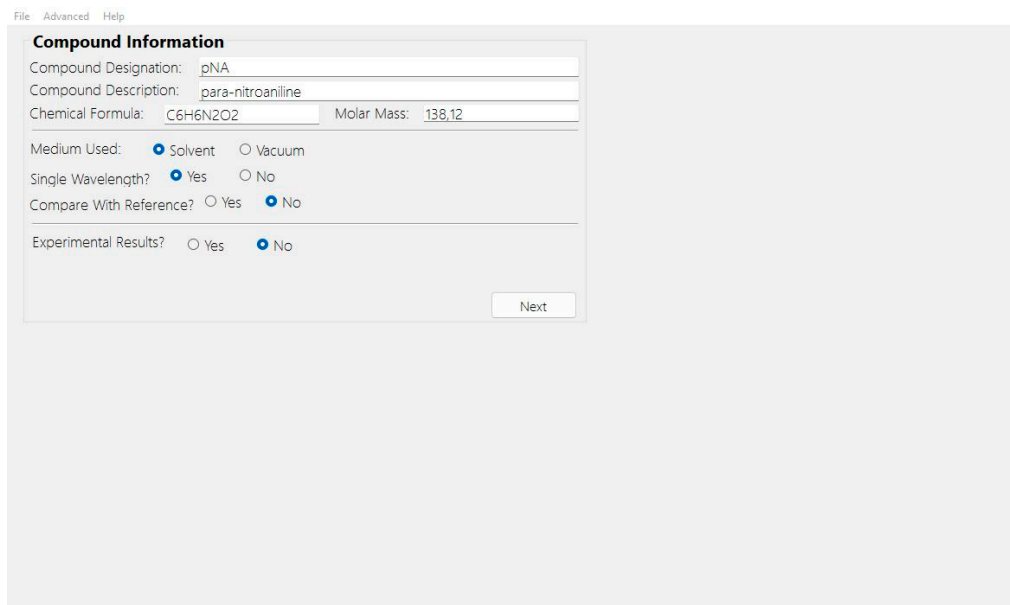

File Advanced Help

**Compound Information**

Compound Designation: pNA

Compound Description: para-nitroaniline

Chemical Formula: C6H6N2O2 Molar Mass: 138,12

Medium Used: ☒ Solvent ☐ Vacuum

Single Wavelength? ☒ Yes ☐ No

Compare With Reference? ☐ Yes ☒ No

Experimental Results? ☐ Yes ☒ No

Next

**Figure S1.** Hyper-QCC first section example. The solvent box is marked since the calculations were carried out using dimethylformamide (DMF) as a medium. Hyper-QCC also offers support to multiple wavelengths calculations, but in this case, the single wavelength is coherent with our logfile.

Once Hyper-QCC is opened, the main window shows some identification information and QCC technical options. Those details are necessary to compare multiple molecules if needed. As an example, we will show how to calculate  $\beta_0$  and  $\beta_{HRS}$  of the well-known reference molecule used in the HRS experiment - para-nitroaniline (pNA). The pNA geometry optimization was carried out the same as all compounds investigated in this work, and, in this showcase, the tensor components were obtained using the level of theory CAM-B3LYP/6-311++G(2d,2p). The Hyper-QCC first section is shown below in figure S1.

File Advanced Help

### Compound Information

Compound Designation: pNA

Compound Description: para-nitroaniline

Chemical Formula: C<sub>6</sub>H<sub>6</sub>N<sub>2</sub>O<sub>2</sub> Molar Mass: 138,12

Medium Used: ☒ Solvent ☐ Vacuum

Single Wavelength? ☒ Yes ☐ No

Compare With Reference? ☐ Yes ☒ No

Experimental Results? ☐ Yes ☒ No

Modify

Gaussian MOPAC

Open GAUSSIAN LOG File

#### Extracted DATA From LOG File

File Name: pNA.log

GAUSSIAN Version: Gaussian 16, Revision B.01,

Functional: CAM-B3LYP Basis Set: 6-311++G(2d,2p)

Solvent: n,n-Dimethylformamide

Single Wavelength (nm): 1319.1nm

Multiple Wavelengths (nm): Single Wavelength

---

Cores Used: 64

Total Time (hours): 0h:1min

Single Core Time (hours): 0min:1.0s

Terminated in: Feb 1 21:50:05 2022.

Calculate

**Figure S2.** Hyper-QCC second section example. In this section is possible to retrieve the parameters chosen prior to the calculations. It is also possible to visualize the CPU's utilized and its performance.

After the first section is fulfilled, the option to import the tensor calculation logfile will be available. By choosing the logfile, some technical-related details will appear regarding calculation parameters and performance results, as well as the option to calculate  $\beta_0$  and  $\beta_{HRS}$ . Figure S2 illustrates the described process.

File Advanced Help

### Compound Information

Compound Designation: pNA  
 Compound Description: para-nitroaniline  
 Chemical Formula: C<sub>6</sub>H<sub>6</sub>N<sub>2</sub>O<sub>2</sub> Molar Mass: 138,12

Medium Used: ☒ Solvent ☐ Vacuum  
 Single Wavelength? ☒ Yes ☐ No  
 Compare With Reference? ☐ Yes ☒ No  
 Experimental Results? ☐ Yes ☒ No

Modify

Gaussian MOPAC

Open GAUSSIAN LOG File

**Extracted DATA From LOG File**

File Name: pNA.log  
 GAUSSIAN Version: Gaussian 16, Revision B.01,  
 Functional: CAM-B3LYP Basis Set: 6-311++G(2d,2p)  
 Solvent: n,n-DimethylFormamide  
 Single Wavelength (nm): 1319.1nm  
 Multiple Wavelengths (nm): Single Wavelength

Cores Used: 64  
 Total Time (hours): 0h:1min  
 Single Core Time (hours): 0min:1.0s  
 Terminated in: Feb 1 21:50:05 2022

Calculate

### First-order Molecular Hyperpolarizability Results

Calculated Compound: pNA Total dipole moment: 9.1198 D

|                          | Static | 1319nm |
|--------------------------|--------|--------|
| Compound Beta (*units*)  | 19.1   | 15.4   |
| Reference Beta (*units*) |        |        |
| Difference (Ratio)       |        |        |

(\*units\*) = x10E-30 (cm<sup>-4</sup>) (statvolt<sup>-1</sup>)

Additional Notes:

Please Cite Us by Clicking Here

**Figure S3.** Hyper-QCC results table. The column “Static” for  $\beta_0$  and the wavelength column displaying  $\beta_{HRS}$ .

Finally, by pressing the “Calculate” button, the  $\beta_0$  and  $\beta_{HRS}$  will be immediately displayed without further user interaction. As shown in figure S3, the values displayed can be retrieved as text or in a data format. This process could be repeated multiple times, which gives the possibility of one comparing several molecules with the developed software.

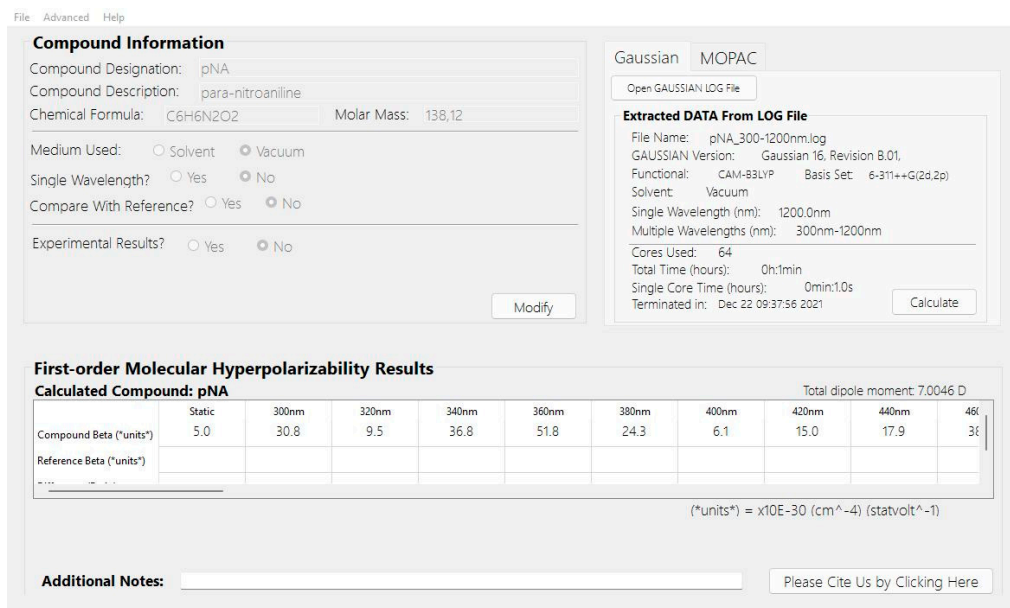

**Figure S4.** Hyper-QCC results table for multiple tensor logfile. The column “Static” for  $\beta_0$  and the multiple wavelengths are distributed in the columns displaying  $\beta_{HRS}$ .

Moreover, Hyper-QCC also supports multiple tensor calculations output files by selecting “No” in the “Single Wavelength?” option in the first section. In figure S4, we displayed an example using the pNA molecule again, varying the incident wavelength from 300 nm to 1200 nm, with a 20 nm step. Hyper-QCC presents ~~are~~ other functionalities, such as comparing the  $\beta_{HRS}$  calculated value to the experimental ones, as well as comparing it to a reference compound.

## **Complete list of the Hyper-QCC functionalities:**

### **1. Computational Functionalities**

- Identify and print the Functional used;
- Identify and print on screen Basis-Set used;
- Identify and print the medium used (solvent or gas-phase). If solvent, it will indicate the solvent;
- Identify and print the wavelength used. If multiple wavelengths were used it would indicate the spectrum.
- Identify and print the number of cores used and the calculation's computational cost;
- Extract  $\beta$ HRS tensor components, calculate and print the final result of multiple calculations;
- Extract  $\beta$ 0 tensor components, calculate and print the final result of multiple calculations;
- Compare  $\beta$ HRS and  $\beta$ 0 with reference molecules calculations built in.
- Compare the  $\beta$ HRS of multiple files in a single table.
- Compare the  $\beta$ HRS retrieve from the input with experimental results.
- Identify and print the Permanent Dipole Moment;

### **2. Export Functionalities**

- Exports a .txt file to easily read the computational data functionalities described above;
- Exports a .dat file to be imported into graphic analysis software;
- Exports a print screen for general purposes.

### **3. Future Functionalities**

- All the computational functionalities above will be implemented for the MOPAC output files.

### 3 – Results

**Table S2:** Theoretical values for static ( $\beta_0$ ) and dynamic at 1064 nm ( $\beta_{\text{HRS}}$ ) first-order molecular hyperpolarizability (in  $10^{-30} \text{ cm}^4 \text{ statvolt}^{-1}$ ) in a solvent medium of the investigated compounds. The computational cost (CC) is represented in terms of one single core, and the units are in hours. However, 64 cores (2.35 GHz) with 128 GB of RAM were used to perform the calculations.

| MOLECULE | B3LYP     |                      |       | CAM-B3LYP |                      |       | EXPERIMENTAL         |
|----------|-----------|----------------------|-------|-----------|----------------------|-------|----------------------|
|          | $\beta_0$ | $\beta_{\text{HRS}}$ | CC    | $\beta_0$ | $\beta_{\text{HRS}}$ | CC    | $\beta_{\text{HRS}}$ |
| A1       | 4.7       | 4.2                  | 20.3  | 4.0       | 3.4                  | 19.2  | $7 \pm 1$            |
| A2       | 9.9       | 109.6                | 61.9  | 5.1       | 6.0                  | 34.1  | $7 \pm 2$            |
| A3       | 9.2       | 11.7                 | 41.6  | 6.7       | 7.6                  | 37.3  | $8 \pm 4$            |
| A4       | 10.0      | 13.5                 | 34.1  | 7.0       | 8.2                  | 30.9  | $9 \pm 4$            |
| A5       | 11.0      | 18.4                 | 2.1   | 10.2      | 15.4                 | 2.1   | $17 \pm 2$           |
| A6       | 17.5      | 31.1                 | 18.1  | 13.7      | 20.6                 | 13.9  | $18 \pm 2$           |
| A7       | 16.4      | 27.1                 | 81.1  | 12.4      | 16.5                 | 56.5  | $17 \pm 3$           |
| A8       | 17.9      | 65.3                 | 88.5  | 11.2      | 15.4                 | 165.3 | $18 \pm 4$           |
| A9       | 28.8      | 449.0                | 160.0 | 14.6      | 21.6                 | 290.1 | $17 \pm 3$           |
| B1       | 87.5      | 461.0                | 53.3  | 35.9      | 64.1                 | 45.9  | $44 \pm 9$           |
| B2       | 99.2      | 590.7                | 43.7  | 39.4      | 73.0                 | 38.4  | $44 \pm 9$           |
| B3       | 33.7      | 78.3                 | 59.7  | 14.8      | 24.2                 | 53.3  | $48 \pm 10$          |
| B4       | 15.3      | 40.3                 | 11.7  | 9.1       | 34.2                 | 8.5   | $25 \pm 5$           |
| B5       | 14.2      | 39.4                 | 10.7  | 7.2       | 26.4                 | 8.5   | $27 \pm 5$           |
| B6       | 48.3      | 69.8                 | 49.1  | 33.2      | 42.5                 | 45.9  | $52 \pm 10$          |
| B7       | 29.2      | 43.1                 | 39.5  | 21.1      | 25.5                 | 34.1  | $24 \pm 5$           |
| B8       | 29.2      | 63.3                 | 11.7  | 22.4      | 48.3                 | 8.5   | $45 \pm 9$           |
| B9       | 30.4      | 52.3                 | 13.9  | 26.6      | 35.0                 | 10.7  | $38 \pm 8$           |
| C1       | 57.8      | 197.7                | 27.7  | 41.4      | 90.4                 | 20.3  | $111 \pm 11$         |
| C2       | 59.3      | 1438.6               | 119.5 | 59.5      | 302.9                | 81.1  | $546 \pm 56$         |
| C3       | 194.6     | 4759.5               | 16.0  | 95.8      | 282.1                | 11.7  | $294 \pm 30$         |
| C4       | 38.7      | 161.9                | 112.0 | 38.3      | 103.5                | 80.0  | $252 \pm 26$         |
| C5       | 181.2     | 1684.2               | 104.5 | 123.7     | 1181.7               | 66.1  | $1932 \pm 200$       |
| C6       | 178.7     | 590.8                | 185.6 | 243.9     | 1069.3               | 110.9 | $695 \pm 95$         |
| C7       | 76.0      | 689.7                | 32.0  | 76.0      | 539.1                | 24.5  | $450 \pm 50$         |
| C8       | 314.7     | 5626.2               | 57.6  | 146.2     | 1377.7               | 39.5  | $1410 \pm 282$       |
| C9       | 193.5     | 18344.0              | 75.7  | 118.2     | 675.4                | 53.3  | $1125 \pm 225$       |

**Table S3:** Theoretical values for static ( $\beta_0$ ) and dynamic at 1064 nm ( $\beta_{\text{HRS}}$ ) first-order molecular hyperpolarizability (in  $10^{-30} \text{ cm}^4 \text{ statvolt}^{-1}$ ) in a solvent medium of the investigated compounds. The computational cost (CC) is represented in terms of one single core, and the units are in hours. However, 64 cores (2.35 GHz) with 128 GB of RAM were used to perform the calculations.

| MOLECULE | M06-2X    |                      |       | TPSSH     |                      |       | EXPERIMENTAL         |
|----------|-----------|----------------------|-------|-----------|----------------------|-------|----------------------|
|          | $\beta_0$ | $\beta_{\text{HRS}}$ | CC    | $\beta_0$ | $\beta_{\text{HRS}}$ | CC    | $\beta_{\text{HRS}}$ |
| A1       | 3.8       | 3.2                  | 21.3  | 4.6       | 4.1                  | 5.3   | $7 \pm 1$            |
| A2       | 4.8       | 5.6                  | 37.3  | 12.5      | 16.8                 | 337.1 | $7 \pm 2$            |
| A3       | 6.8       | 7.8                  | 35.2  | 10.3      | 734.5                | 257.1 | $8 \pm 4$            |
| A4       | 7.1       | 8.3                  | 28.8  | 11.3      | 1386.3               | 215.5 | $9 \pm 4$            |
| A5       | 10.3      | 15.7                 | 2.1   | 11.2      | 19.1                 | 22.4  | $17 \pm 2$           |
| A6       | 13.8      | 21.0                 | 16.0  | 18.9      | 36.1                 | 116.3 | $18 \pm 2$           |
| A7       | 11.1      | 14.5                 | 62.9  | 17.7      | 40.4                 | 94.9  | $17 \pm 3$           |
| A8       | 10.0      | 13.4                 | 69.3  | 21.3      | 50.1                 | 489.6 | $18 \pm 4$           |
| A9       | 13.9      | 20.2                 | 112.0 | 37.4      | 514.1                | 917.3 | $17 \pm 3$           |
| B1       | 34.9      | 61.6                 | 42.7  | 107.7     | 1805.1               | 61.9  | $44 \pm 9$           |
| B2       | 38.4      | 70.3                 | 35.2  | 122.2     | 2851.2               | 51.2  | $44 \pm 9$           |
| B3       | 15.9      | 26.2                 | 48.0  | 42.9      | 119.8                | 69.3  | $48 \pm 10$          |
| B4       | 10.3      | 35.9                 | 10.7  | 44.1      | 83.3                 | 13.9  | $25 \pm 5$           |
| B5       | 9.8       | 33.7                 | 9.6   | 33.9      | 58.9                 | 12.8  | $27 \pm 5$           |
| B6       | 32.6      | 42.5                 | 49.1  | 53.4      | 97.5                 | 16.0  | $52 \pm 10$          |
| B7       | 19.2      | 33.1                 | 30.9  | 29.6      | 45.7                 | 10.7  | $24 \pm 5$           |
| B8       | 22.5      | 47.6                 | 9.6   | 209.4     | 56.7                 | 13.9  | $45 \pm 9$           |
| B9       | 25.6      | 37.1                 | 12.8  | 40.0      | 68.5                 | 17.1  | $38 \pm 8$           |
| C1       | 43.9      | 98.7                 | 23.5  | 64.1      | 278.5                | 33.1  | $111 \pm 11$         |
| C2       | 62.6      | 430.3                | 86.4  | 59.3      | 3506.2               | 139.7 | $546 \pm 56$         |
| C3       | 97.3      | 287.4                | 12.8  | 227.8     | 4123.6               | 18.1  | $294 \pm 30$         |
| C4       | 39.6      | 119.6                | 151.5 | 41.9      | 203.5                | 157.9 | $252 \pm 26$         |
| C5       | 135.7     | 1615.3               | 70.4  | 201.4     | 1293.7               | 220.8 | $1932 \pm 200$       |
| C6       | 257.7     | 1502.8               | 124.8 | 162.9     | 97.5                 | 226.1 | $695 \pm 95$         |
| C7       | 73.7      | 480.9                | 25.6  | 72.2      | 3523.0               | 41.6  | $450 \pm 50$         |
| C8       | 148.7     | 1485.5               | 41.6  | 436.0     | 1112.5               | 62.9  | $1410 \pm 282$       |
| C9       | 120.3     | 705.8                | 58.7  | 219.0     | 4430.0               | 87.5  | $1125 \pm 225$       |

**Table S4:** Theoretical values for static ( $\beta_0$ ) and dynamic at 1064 nm ( $\beta_{\text{HRS}}$ ) first-order molecular hyperpolarizability (in  $10^{-30} \text{ cm}^4 \text{ statvolt}^{-1}$ ) in a solvent medium of the investigated compounds. The computational cost (CC) is represented in terms of one single core, and the units are in hours. However, 64 cores (2.35 GHz) with 128 GB of RAM were used to perform the calculations.

| MOLECULE | PBE1PBE   |                      |       | wB97xD    |                      |       | EXPERIMENTAL         |
|----------|-----------|----------------------|-------|-----------|----------------------|-------|----------------------|
|          | $\beta_0$ | $\beta_{\text{HRS}}$ | CC    | $\beta_0$ | $\beta_{\text{HRS}}$ | CC    | $\beta_{\text{HRS}}$ |
| A1       | 4.3       | 3.7                  | 4.3   | 3.8       | 3.1                  | 4.3   | $7 \pm 1$            |
| A2       | 8.1       | 89.5                 | 46.9  | 4.7       | 5.3                  | 30.9  | $7 \pm 2$            |
| A3       | 8.6       | 10.6                 | 38.4  | 6.4       | 4123.6               | 28.8  | $8 \pm 4$            |
| A4       | 9.3       | 12.0                 | 32.0  | 6.7       | 7.7                  | 26.2  | $9 \pm 4$            |
| A5       | 10.8      | 17.4                 | 2.1   | 9.9       | 14.9                 | 1.8   | $17 \pm 2$           |
| A6       | 16.6      | 28.2                 | 17.1  | 13.2      | 19.4                 | 13.9  | $18 \pm 2$           |
| A7       | 14.8      | 22.2                 | 73.6  | 11.6      | 15.3                 | 54.4  | $17 \pm 3$           |
| A8       | 15.3      | 29.9                 | 80.0  | 10.3      | 13.8                 | 57.6  | $18 \pm 4$           |
| A9       | 23.5      | 73.2                 | 144.0 | 12.9      | 18.3                 | 101.3 | $17 \pm 3$           |
| B1       | 70.6      | 232.4                | 48.0  | 30.0      | 49.5                 | 38.4  | $44 \pm 9$           |
| B2       | 79.6      | 282.7                | 39.5  | 32.4      | 55.2                 | 32.0  | $44 \pm 9$           |
| B3       | 28.5      | 59.6                 | 54.4  | 12.8      | 20.1                 | 42.7  | $48 \pm 10$          |
| B4       | 35.8      | 56.3                 | 10.7  | 22.8      | 28.9                 | 9.6   | $25 \pm 5$           |
| B5       | 27.9      | 41.4                 | 9.6   | 18.7      | 23.1                 | 8.5   | $27 \pm 5$           |
| B6       | 44.1      | 66.9                 | 12.8  | 30.4      | 37.4                 | 10.7  | $52 \pm 10$          |
| B7       | 25.0      | 34.1                 | 8.5   | 18.2      | 21.2                 | 7.5   | $24 \pm 5$           |
| B8       | 43.2      | 123.2                | 10.7  | 21.3      | 43.2                 | 9.6   | $45 \pm 9$           |
| B9       | 34.0      | 51.5                 | 12.8  | 25.6      | 37.1                 | 11.7  | $38 \pm 8$           |
| C1       | 55.0      | 167.7                | 26.7  | 38.9      | 81.2                 | 20.3  | $111 \pm 11$         |
| C2       | 59.3      | 734.5                | 112.0 | 59.6      | 280.6                | 80.0  | $546 \pm 56$         |
| C3       | 167.8     | 1386.3               | 14.9  | 80.1      | 206.1                | 10.7  | $294 \pm 30$         |
| C4       | 38.1      | 136.0                | 126.9 | 38.5      | 100.4                | 74.7  | $252 \pm 26$         |
| C5       | 171.6     | 2660.5               | 157.9 | 113.7     | 811.4                | 62.9  | $1932 \pm 200$       |
| C6       | 188.0     | 41.4                 | 155.7 | 253.7     | 1533.2               | 100.3 | $695 \pm 95$         |
| C7       | 73.3      | 966.8                | 30.9  | 72.8      | 469.9                | 21.3  | $450 \pm 50$         |
| C8       | 176.6     | 2567.1               | 57.6  | 127.4     | 852.8                | 37.3  | $1410 \pm 282$       |
| C9       | 176.6     | 6407.2               | 70.4  | 104.7     | 508.2                | 50.1  | $1125 \pm 225$       |



**Table S5:** Theoretical values for static ( $\beta_0$ ) and dynamic at 1064 nm ( $\beta_{\text{HRS}}$ ) first-order molecular hyperpolarizability (in  $10^{-30} \text{ cm}^4 \text{ statvolt}^{-1}$ ) in a solvent medium of the investigated compounds. The computational cost (CC) is represented in terms of one single core, and the units are in hours. However, 64 cores (2.35 GHz) with 128 GB of RAM were used to perform the calculations.

| MOLECULE | HF        |                      | EXPERIMENTAL |                      |
|----------|-----------|----------------------|--------------|----------------------|
|          | $\beta_0$ | $\beta_{\text{HRS}}$ | CC           | $\beta_{\text{HRS}}$ |
| A1       | 2.9       | 2.3                  | 2.1          | $7 \pm 1$            |
| A2       | 3.2       | 3.1                  | 21.3         | $7 \pm 2$            |
| A3       | 4.4       | 4.8                  | 22.4         | $8 \pm 4$            |
| A4       | 4.5       | 4.9                  | 18.1         | $9 \pm 4$            |
| A5       | 7.2       | 9.5                  | 1.1          | $17 \pm 2$           |
| A6       | 8.6       | 11.1                 | 9.6          | $18 \pm 2$           |
| A7       | 7.1       | 8.0                  | 38.4         | $17 \pm 3$           |
| A8       | 5.8       | 6.6                  | 41.6         | $18 \pm 4$           |
| A9       | 7.1       | 8.3                  | 70.4         | $17 \pm 3$           |
| B1       | 17.2      | 22.8                 | 25.6         | $44 \pm 9$           |
| B2       | 18.7      | 25.4                 | 21.3         | $44 \pm 9$           |
| B3       | 7.1       | 9.3                  | 29.9         | $48 \pm 10$          |
| B4       | 14.1      | 15.2                 | 6.4          | $25 \pm 5$           |
| B5       | 12.3      | 13.1                 | 5.3          | $27 \pm 5$           |
| B6       | 19.3      | 20.1                 | 7.5          | $52 \pm 10$          |
| B7       | 12.0      | 12.2                 | 4.3          | $24 \pm 5$           |
| B8       | 14.2      | 24.2                 | 6.4          | $45 \pm 9$           |
| B9       | 15.0      | 16.5                 | 7.5          | $38 \pm 8$           |
| C1       | 22.5      | 35.8                 | 13.9         | $111 \pm 11$         |
| C2       | 48.6      | 98.4                 | 52.3         | $546 \pm 56$         |
| C3       | 45.2      | 83.3                 | 7.5          | $294 \pm 30$         |
| C4       | 37.6      | 62.6                 | 49.1         | $252 \pm 26$         |
| C5       | 47.7      | 130.3                | 41.6         | $1932 \pm 200$       |
| C6       | 160.9     | 1324.9               | 68.3         | $695 \pm 95$         |
| C7       | 48.4      | 108.5                | 13.9         | $450 \pm 50$         |
| C8       | 80.1      | 263.2                | 25.6         | $1410 \pm 282$       |
| C9       | 68.8      | 194.7                | 34.1         | $1125 \pm 225$       |

**Table S6:** All  $\beta_{\text{HRS}}$  values are in  $10^{-30} \text{ cm}^4 \text{ statvolt}^{-1}$  units and computational cost per core (CC) in hour. 64 cores were used in the calculations. The relative error was calculated considering the following equation  $RE = |\beta_{\text{DZ}} - \beta_{\text{TZ}}|/\beta_{\text{TZ}}$ .

| MOLECULE | DOUBLE-ZETA (DZ)         |                      |      | TRIPLE-ZETA (TZ)          |                      |       | RELATIVE             |
|----------|--------------------------|----------------------|------|---------------------------|----------------------|-------|----------------------|
|          | CAM-B3LYP/6-31++G(2D,2P) |                      |      | CAM-B3LYP/6-311++G(2D,2P) |                      |       | ERROR                |
|          | $\beta_0$                | $\beta_{\text{HRS}}$ | CC   | $\beta_0$                 | $\beta_{\text{HRS}}$ | CC    | $\beta_{\text{HRS}}$ |
| A1       | 4.0                      | 3.3                  | 2.1  | 4.0                       | 3.4                  | 19.2  | 0.03                 |
| A2       | 4.9                      | 5.7                  | 21.3 | 5.1                       | 6.0                  | 34.1  | 0.05                 |
| A3       | 7.0                      | 8.0                  | 19.2 | 6.7                       | 7.6                  | 37.3  | 0.05                 |
| A4       | 7.3                      | 8.5                  | 17.1 | 7.0                       | 8.2                  | 30.9  | 0.04                 |
| A5       | 10.3                     | 15.5                 | 2.1  | 10.2                      | 15.4                 | 2.1   | 0.01                 |
| A6       | 13.9                     | 20.7                 | 9.6  | 13.7                      | 20.6                 | 13.9  | 0.00                 |
| A7       | 12.4                     | 16.6                 | 35.2 | 12.4                      | 16.5                 | 56.5  | 0.01                 |
| A8       | 11.2                     | 15.4                 | 37.3 | 11.2                      | 15.4                 | 165.3 | 0.00                 |
| A9       | 14.7                     | 21.7                 | 67.2 | 14.6                      | 21.6                 | 290.1 | 0.00                 |
| B1       | 35.8                     | 64.0                 | 24.5 | 35.9                      | 64.1                 | 45.9  | 0.00                 |
| B2       | 39.4                     | 72.9                 | 20.3 | 39.4                      | 73.0                 | 38.4  | 0.00                 |
| B3       | 14.7                     | 24.0                 | 28.8 | 14.8                      | 24.2                 | 53.3  | 0.01                 |
| B4       | 24.5                     | 31.9                 | 6.4  | 9.1                       | 34.2                 | 8.5   | 0.07                 |
| B5       | 20.3                     | 25.6                 | 5.3  | 7.2                       | 26.4                 | 8.5   | 0.03                 |
| B6       | 33.0                     | 41.7                 | 7.5  | 33.2                      | 42.5                 | 45.9  | 0.02                 |
| B7       | 19.6                     | 23.2                 | 4.3  | 21.1                      | 25.5                 | 34.1  | 0.09                 |
| B8       | 24.0                     | 50.6                 | 5.3  | 22.4                      | 45.6                 | 8.5   | 0.11                 |
| B9       | 26.7                     | 35.5                 | 7.5  | 26.6                      | 35.0                 | 10.7  | 0.01                 |
| C1       | 41.6                     | 89.6                 | 12.8 | 41.4                      | 90.4                 | 20.3  | 0.01                 |
| C2       | 59.8                     | 297.8                | 54.4 | 59.5                      | 302.9                | 81.1  | 0.02                 |
| C3       | 95.7                     | 278.9                | 7.5  | 95.8                      | 282.1                | 11.7  | 0.01                 |
| C4       | 38.7                     | 103.1                | 51.2 | 38.3                      | 103.5                | 80.0  | 0.00                 |
| C5       | 123.8                    | 1169.                | 42.7 | 123.7                     | 1181.7               | 66.1  | 0.01                 |
| C6       | 244.1                    | 1243.3               | 69.3 | 243.9                     | 1069.3               | 110.9 | 0.16                 |
| C7       | 75.9                     | 533.9                | 14.9 | 76.0                      | 539.1                | 24.5  | 0.01                 |
| C8       | 147.7                    | 1392.5               | 24.5 | 146.2                     | 1377.7               | 39.5  | 0.01                 |
| C9       | 118.2                    | 669.3                | 33.1 | 118.2                     | 675.4                | 53.3  | 0.01                 |

**Table S7:** The following data was obtained for compound A7. All  $\beta_0$  and  $\beta_{HRS}$  values are in  $10^{-30}$  cm<sup>4</sup> statvolt<sup>-1</sup> units and computational cost per core (CC) in hour. 64 cores were used in the calculations. The relative error was calculated considering the following equation  $RE = |\beta_{HRS} - \beta_{HRS-EXP}|/\beta_{HRS-EXP}$ .

$$\beta_{HRS-EXP.} = 17$$

| Functional       | Basis-Set  | $\beta_0$ | $\beta_{HRS}$ | Relative Error<br>to Exp. Value | CC    |
|------------------|------------|-----------|---------------|---------------------------------|-------|
| <b>HF</b>        | (2d,2p)    | 7.1       | 8.0           | 0.53                            | 38.4  |
|                  | (2df, 2pd) | 5.8       | 6.6           | 0.61                            | 75.7  |
| <b>CAM-B3LYP</b> | (2d,2p)    | 12.4      | 16.5          | 0.03                            | 56.5  |
|                  | (2df, 2pd) | 12.2      | 16.3          | 0.04                            | 124.8 |
| <b>B3LYP</b>     | (2d,2p)    | 16.4      | 27.1          | 0.59                            | 81.1  |
|                  | (2df, 2pd) | 16.3      | 26.7          | 0.57                            | 158.9 |
| <b>M06-2X</b>    | (2d,2p)    | 11.1      | 14.5          | 0.15                            | 62.9  |
|                  | (2df, 2pd) | 11.0      | 14.2          | 0.16                            | 124.8 |
| <b>TPSSH</b>     | (2d,2p)    | 17.7      | 40.4          | 1.38                            | 94.9  |
|                  | (2df, 2pd) | 17.5      | 38.4          | 1.26                            | 184.5 |
| <b>PBE1PBE</b>   | (2d,2p)    | 14.8      | 22.2          | 0.31                            | 73.6  |
|                  | (2df, 2pd) | 11.9      | 21.8          | 0.28                            | 153.6 |
| <b>wB97xD</b>    | (2d,2p)    | 11.6      | 15.3          | 0.10                            | 54.4  |
|                  | (2df, 2pd) | 11.9      | 15.7          | 0.08                            | 117.3 |

**Table S8:** The following data was obtained for compound B6. All  $\beta_0$  and  $\beta_{HRS}$  values are in  $10^{-30}$  cm<sup>4</sup> statvolt<sup>-1</sup> units and computational cost per core (CC) in hour. 64 cores were used in the calculations. The relative error was calculated considering the following equation  $RE = |\beta_{HRS} - \beta_{HRS-EXP}|/\beta_{HRS-EXP}$ .

$$\beta_{HRS-EXP} = 52$$

| Functional       | Basis-Set  | $\beta_0$ | $\beta_{HRS}$ | Relative Error<br>to Exp. Value | C.C.  |
|------------------|------------|-----------|---------------|---------------------------------|-------|
| <b>HF</b>        |            |           |               |                                 |       |
|                  | (2d,2p)    | 19.3      | 20.1          | 0.61                            | 7.5   |
|                  | (2df, 2pd) | 19.1      | 19.9          | 0.62                            | 16.0  |
| <b>CAM-B3LYP</b> |            |           |               |                                 |       |
|                  | (2d,2p)    | 33.2      | 42.5          | 0.18                            | 45.9  |
|                  | (2df, 2pd) | 32.4      | 41.0          | 0.21                            | 293.3 |
| <b>B3LYP</b>     |            |           |               |                                 |       |
|                  | (2d,2p)    | 48.3      | 69.8          | 0.34                            | 49.1  |
|                  | (2df, 2pd) | 47.4      | 76.9          | 0.48                            | 315.7 |
| <b>M06-2X</b>    |            |           |               |                                 |       |
|                  | (2d,2p)    | 32.6      | 42.5          | 0.18                            | 49.1  |
|                  | (2df, 2pd) | 31.6      | 40.8          | 0.22                            | 280.5 |
| <b>TPSSH</b>     |            |           |               |                                 |       |
|                  | (2d,2p)    | 53.4      | 97.5          | 0.88                            | 16.0  |
|                  | (2df, 2pd) | 52.9      | 96.1          | 0.85                            | 32.0  |
| <b>PBE1PBE</b>   |            |           |               |                                 |       |
|                  | (2d,2p)    | 44.1      | 66.9          | 0.29                            | 12.8  |
|                  | (2df, 2pd) | 43.7      | 66.1          | 0.27                            | 26.7  |
| <b>wB97xD</b>    |            |           |               |                                 |       |
|                  | (2d,2p)    | 30.4      | 37.4          | 0.28                            | 10.7  |
|                  | (2df, 2pd) | 11.9      | 37.7          | 0.28                            | 26.7  |

**Table S9:** The following data was obtained for compound C8. All  $\beta_0$  and  $\beta_{HRS}$  values are in  $10^{-30}$  cm<sup>4</sup> statvolt<sup>-1</sup> units and computational cost per core (CC) in hour. 64 cores were used in the calculations. The relative error was calculated considering the following equation  $RE = |\beta_{HRS} - \beta_{HRS-EXP}|/\beta_{HRS-EXP}$ .

$$\beta_{HRS-EXP} = 1410$$

| Functional       | Basis-Set  | $\beta_0$ | $\beta_{HRS}$ | Relative Error<br>to Exp. Value | C.C.  |
|------------------|------------|-----------|---------------|---------------------------------|-------|
| <b>HF</b>        | (2d,2p)    | 80.1      | 263.2         | 0.81                            | 25.6  |
|                  | (2df, 2pd) | 68.8      | 194.7         | 0.86                            | 52.3  |
| <b>CAM-B3LYP</b> | (2d,2p)    | 314.7     | 1377.7        | 0.02                            | 39.5  |
|                  | (2df, 2pd) | 145.0     | 1345.9        | 0.05                            | 84.3  |
| <b>B3LYP</b>     | (2d,2p)    | 314.7     | 5626.2        | 2.99                            | 57.6  |
|                  | (2df, 2pd) | 311.7     | 4706.8        | 2.34                            | 118.4 |
| <b>M06-2X</b>    | (2d,2p)    | 148.7     | 1485.5        | 0.05                            | 41.6  |
|                  | (2df, 2pd) | 147.5     | 1455.6        | 0.03                            | 85.3  |
| <b>TPSSH</b>     | (2d,2p)    | 436.0     | 1112.5        | 0.21                            | 62.9  |
|                  | (2df, 2pd) | 430.6     | 1126.1        | 0.20                            | 124.8 |
| <b>PBE1PBE</b>   | (2d,2p)    | 176.6     | 2567.1        | 0.82                            | 57.6  |
|                  | (2df, 2pd) | 269.2     | 2578.5        | 0.83                            | 116.3 |
| <b>wB97xD</b>    | (2d,2p)    | 127.4     | 852.8         | 0.40                            | 37.7  |
|                  | (2df, 2pd) | 128.4     | 841.8         | 0.40                            | 82.1  |

#### 4 – Computational Details of C5.

We have calculated C5 in both forms, i.e., the cationic-conjugated molecule with its counterion (C5-Full) and the cationic-conjugated molecule separated from its counterion (C5-Cationic Part, C5-Anionic Part). As verified (table S10), when the parts were computed separately, the calculated dynamic first-order molecular hyperpolarizability from the cationic part achieved a value one order of magnitude lower than the experimental one.

**Table S10:** All  $\beta_0$  and  $\beta_{HRS}$  values are in  $10^{-30} \text{ cm}^4 \text{ statvolt}^{-1} \text{ units}$ .

| MOLECULE    | CAM-B3LYP<br>6-311++G(2D,2P) |               | EXPERIMENTAL   |
|-------------|------------------------------|---------------|----------------|
|             | $\beta_0$                    | $\beta_{HRS}$ | $\beta_{HRS}$  |
| C5-FULL     | 123.7                        | 1181.7        | $1932 \pm 200$ |
| C5-CATIONIC | 17.7                         | 111.7         |                |
| C5-ANIONIC  | 2.8                          | 3.1           |                |

Regarding the Potential Energy Surface (PES), we have decided to start with the geometry depicted in Figure S1. Still, there are countless possibilities for the geometry starting point. However, in this work, we decided to use the same approach for all investigated molecules' geometry starting points:

1. Generating the Simplified Molecular Input Line Entry System (SMILES);
2. Importing SMILES to Avogadro;
3. The "Optimize Geometry" command in Avogadro is executed to create the geometry starting point.
4. Only after defining the starting point the cartesian coordinates were applied to the Gaussian command file for optimization, i.e., to calculate the PES local minimum.

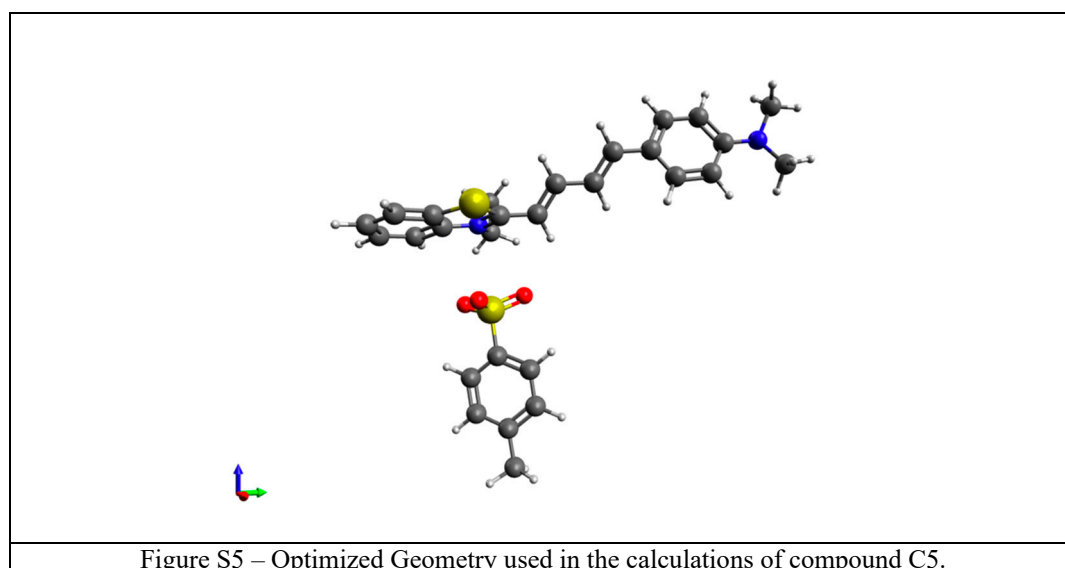

Supplement: s1 [file s1]
